# Supplementary material for: A fully reduced {VIV18O42} host and VO43−, Cl− as guest anions: synthesis, characterization and proton conductivity
Source: Royal Society of Chemistry journal article supplement (doi:10.1039/c9nj01918a), 2019-01-01
Supplement: c9nj01918a1.pdf [file c9nj01918a1.pdf]

## **A fully reduced $\{V^{IV}_{18}O_{42}\}$ host and $VO_4^{3-}$ , $Cl^-$ as guest anions: synthesis, characterization and proton conductivity**

Sateesh Mulkapuri, Sathish Kumar Kurapati, Subhabrata Mukhopadhyay and Samar K. Das\*

School of Chemistry, University of Hyderabad,  
P.O. Central University, Hyderabad – 500046, India

### **Electronic Supporting Information (ESI)**

| <b>Section</b> | <b>Index</b>                                                                                      | <b>Page No.</b> |
|----------------|---------------------------------------------------------------------------------------------------|-----------------|
| <b>S1</b>      | <b>Powder X-ray diffraction analyses of compounds 1 and 2</b>                                     | <b>S2</b>       |
| <b>S2</b>      | <b>Single crystal X-ray crystallography of compounds 1 and 2</b>                                  | <b>S3-S11</b>   |
| <b>S3</b>      | <b>Thermogravimetric analyses (TGA) of compounds 1 and 2</b>                                      | <b>S12</b>      |
| <b>S4</b>      | <b>Bond valance sum calculations on the crystal structures of compounds 1 and 2</b>               | <b>S13-S19</b>  |
| <b>S5</b>      | <b>X-ray photoelectron spectra for compounds 1 and 2</b>                                          | <b>S20-S22</b>  |
| <b>S6</b>      | <b>UV-Vis absorption spectra for compounds 1 and 2</b>                                            | <b>S22-S23</b>  |
| <b>S7</b>      | <b>ICP-OES and CHN analysis reports of compounds 1 and 2</b>                                      | <b>S23-S26</b>  |
| <b>S8</b>      | <b>Electrochemical Impedance spectra analyses of compounds 1 and 2 and Controlled experiments</b> | <b>S27-S33</b>  |
| <b>S9</b>      | <b>References</b>                                                                                 | <b>S34</b>      |

## Section S1. Powder X-ray diffraction analysis of compounds 1 and 2

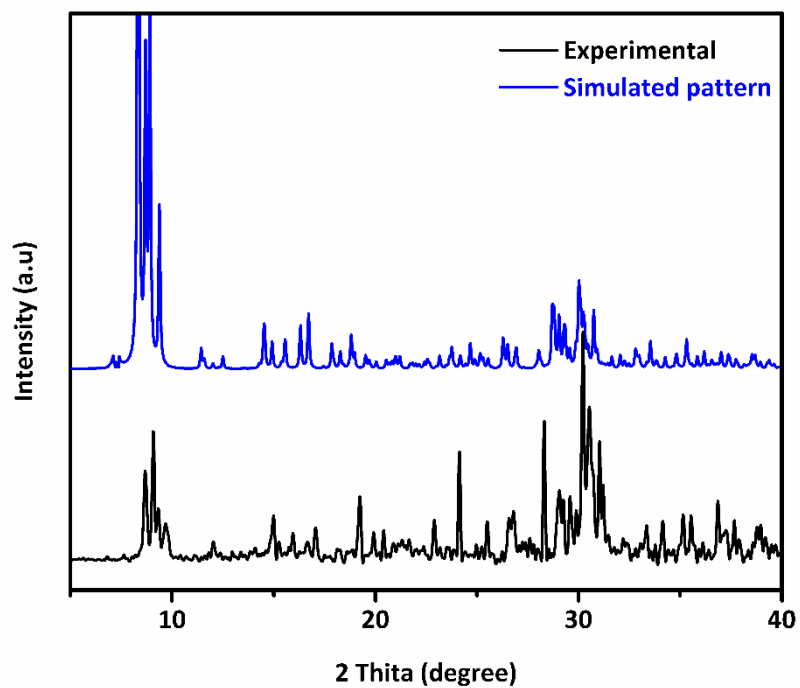

Fig. S1 Powder X-ray diffraction analysis of compound 1.

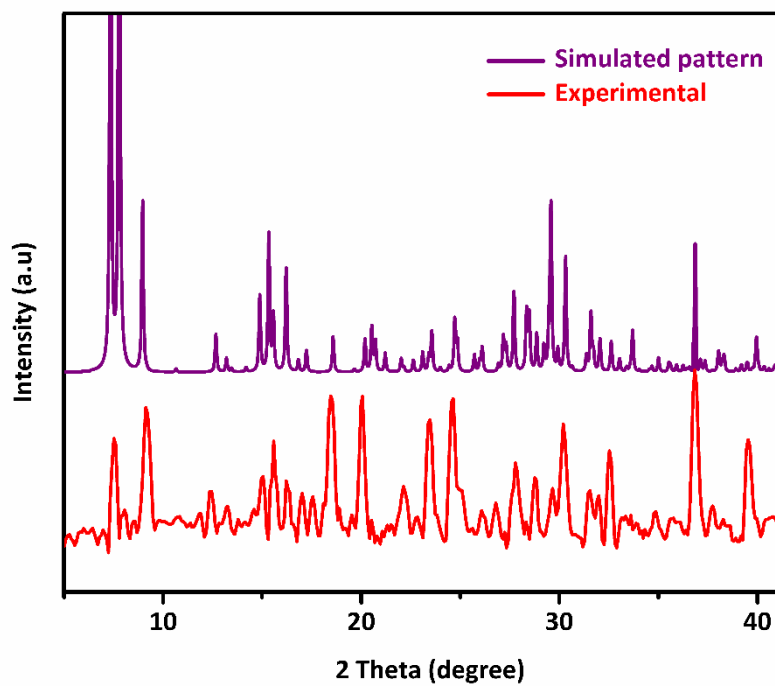

Fig. S2 Powder X-ray diffraction analysis of compound 2.

Section S2. Single crystal X-ray crystallography of compounds 1 and 2

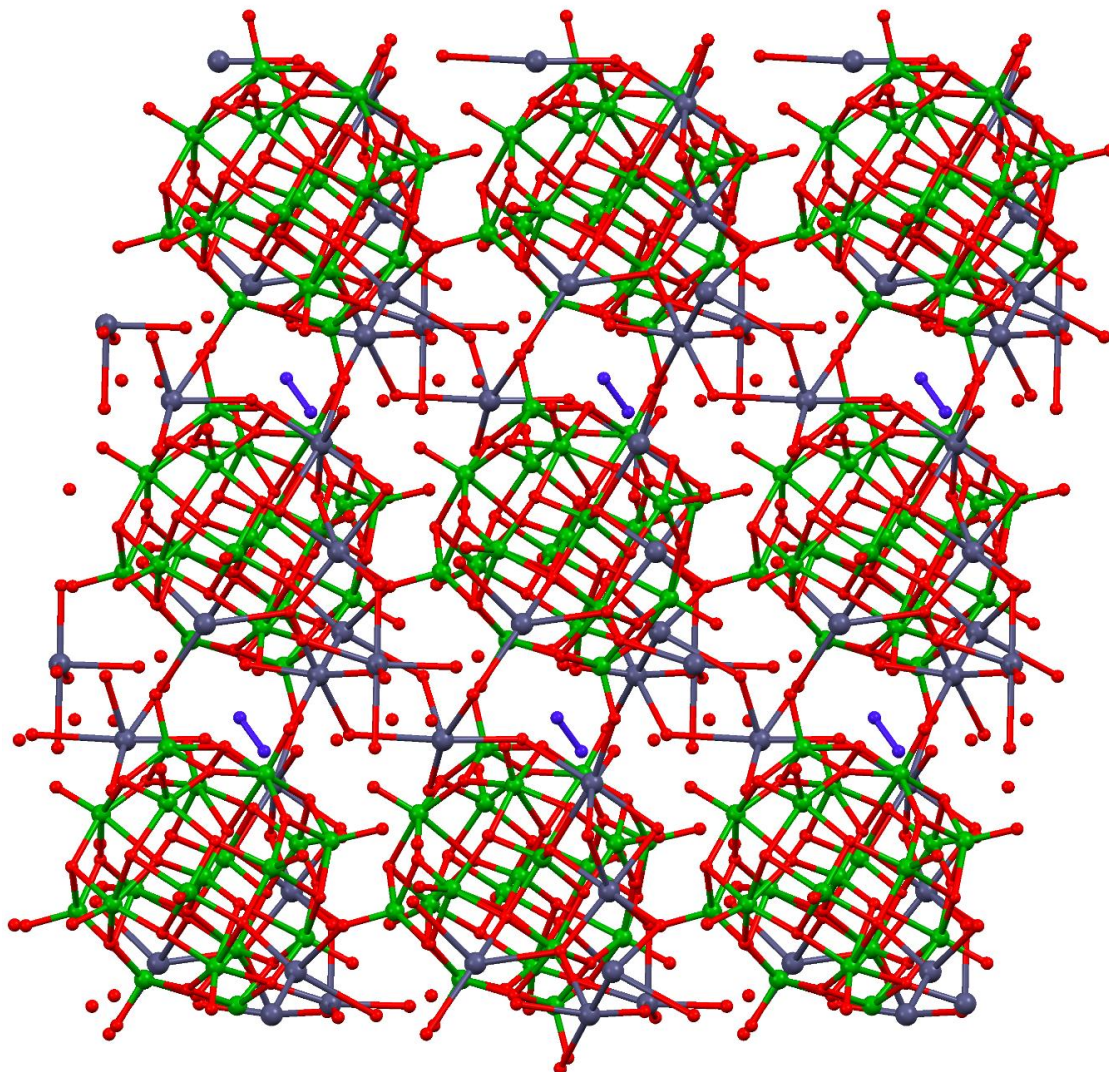

**Fig. S3** Molecular packing, found in the crystal structure of compound **1**, viewed down to the crystallographic *b*-axis.

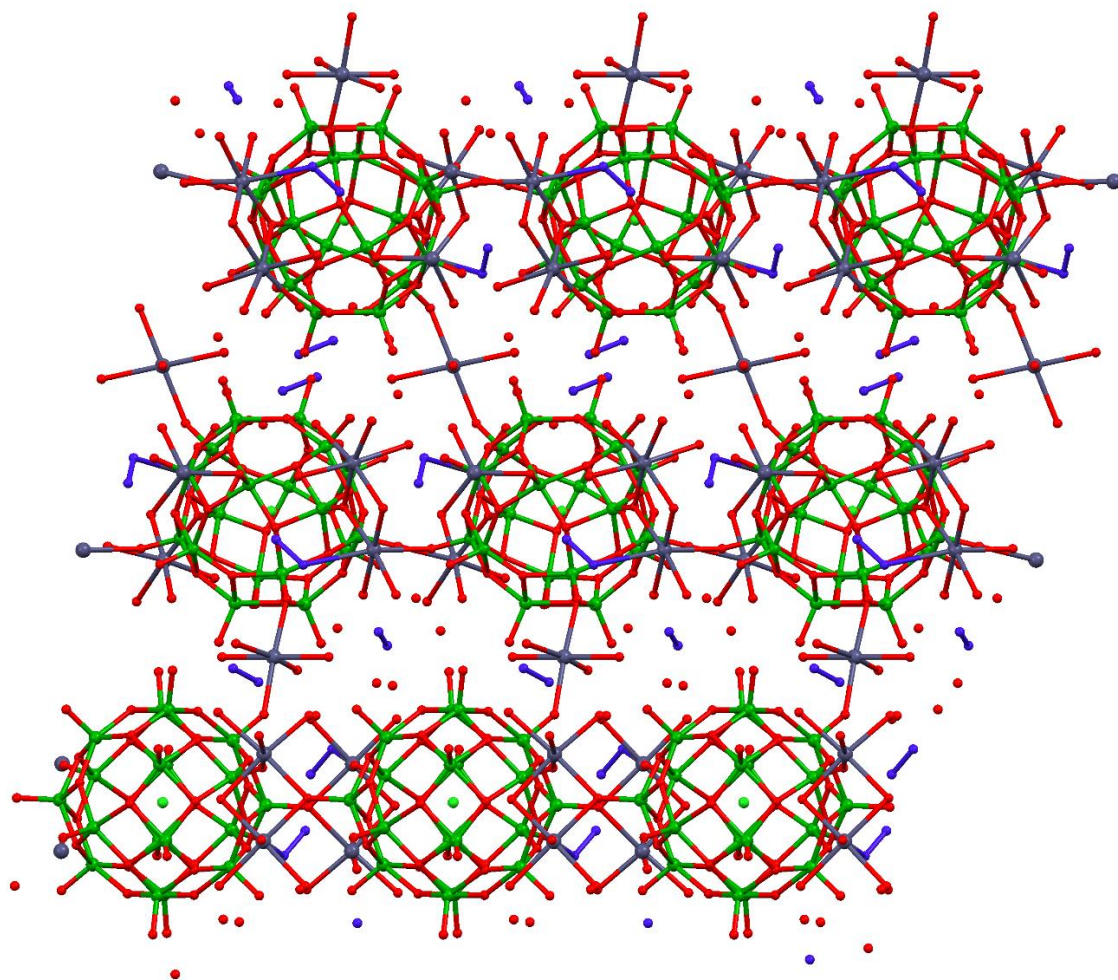

**Fig. S4** Molecular packing, found in the crystal structure of compound **2**, viewed down to the crystallographic *b*-axis.

**Table S1. Bond distances (Å) and angles (°) for compound 1**

|             |          |             |          |
|-------------|----------|-------------|----------|
| V(1)-O(2)   | 1.689(8) | V(11)-O(41) | 1.632(8) |
| V(1)-O(4)   | 1.698(7) | V(11)-O(16) | 1.932(8) |
| V(1)-O(1)   | 1.711(7) | V(11)-O(39) | 1.974(7) |
| V(1)-O(3)   | 1.731(7) | V(11)-O(43) | 1.989(7) |
| V(15)-O(46) | 1.625(7) | V(11)-O(38) | 2.044(8) |
| V(15)-O(8)  | 1.936(7) | V(11)-O(2)  | 2.403(8) |
| V(15)-O(34) | 1.958(7) | V(8)-O(27)  | 1.612(8) |
| V(15)-O(9)  | 2.021(7) | V(8)-O(29)  | 1.944(8) |
| V(15)-O(32) | 2.059(7) | V(8)-O(28)  | 1.985(8) |
| V(15)-O(4)  | 2.368(7) | V(8)-O(25)  | 1.985(8) |
| V(9)-O(30)  | 1.625(7) | V(8)-O(23)  | 2.078(7) |
| V(9)-O(25)  | 1.940(7) | V(8)-O(3)   | 2.431(7) |
| V(9)-O(31)  | 1.975(7) | V(17)-O(36) | 1.620(8) |
| V(9)-O(21)  | 1.987(8) | V(17)-O(31) | 1.926(7) |
| V(9)-O(32)  | 2.057(7) | V(17)-O(29) | 1.966(8) |
| V(9)-O(4)   | 2.439(7) | V(17)-O(35) | 1.978(7) |
| V(16)-O(45) | 1.620(7) | V(17)-O(38) | 2.082(8) |
| V(16)-O(44) | 1.930(7) | V(17)-O(2)  | 2.355(7) |
| V(16)-O(35) | 1.970(7) | V(4)-O(13)  | 1.634(8) |
| V(16)-O(34) | 1.977(7) | V(4)-O(14)  | 1.926(7) |
| V(16)-O(43) | 1.977(8) | V(4)-O(16)  | 1.945(7) |
| V(10)-O(33) | 1.659(8) | V(4)-O(11)  | 1.963(8) |
| V(10)-O(34) | 1.892(7) | V(4)-O(15)  | 2.050(7) |
| V(10)-O(31) | 1.894(7) | V(3)-O(10)  | 1.630(8) |
| V(10)-O(35) | 1.950(8) | V(3)-O(12)  | 1.952(8) |
| V(10)-O(32) | 2.103(8) | V(3)-O(7)   | 1.962(7) |
| V(6)-O(19)  | 1.622(8) | V(3)-O(11)  | 2.000(7) |
| V(6)-O(20)  | 1.953(7) | V(3)-O(6)   | 2.029(7) |
| V(6)-O(21)  | 1.964(7) | V(3)-O(1)   | 2.413(8) |
| V(6)-O(7)   | 1.970(7) | V(19)-O(26) | 1.651(8) |
| V(6)-O(9)   | 2.026(7) | V(19)-O(12) | 1.903(8) |
| V(18)-O(47) | 1.622(8) | V(19)-O(20) | 1.936(8) |
| V(18)-O(8)  | 1.949(8) | V(19)-O(23) | 2.058(7) |
| V(18)-O(44) | 1.955(7) | V(19)-O(18) | 2.073(8) |
| V(18)-O(6)  | 2.000(8) | V(19)-O(3)  | 2.198(8) |
| V(18)-O(15) | 2.059(7) | V(14)-O(42) | 1.670(9) |
| V(18)-O(1)  | 2.357(7) | V(14)-O(16) | 1.866(7) |

|                   |          |                   |          |
|-------------------|----------|-------------------|----------|
| V(14)-O(44)       | 1.903(8) | O(46)-V(15)-O(9)  | 97.1(4)  |
| V(14)-O(43)       | 1.936(8) | O(8)-V(15)-O(9)   | 81.7(3)  |
| V(14)-O(15)       | 2.111(8) | O(34)-V(15)-O(9)  | 159.2(3) |
| V(7)-O(22)        | 1.641(8) | O(46)-V(15)-O(32) | 97.4(4)  |
| V(7)-O(25)        | 1.873(7) | O(8)-V(15)-O(32)  | 159.2(3) |
| V(7)-O(20)        | 1.886(7) | O(34)-V(15)-O(32) | 81.4(3)  |
| V(7)-O(21)        | 1.960(8) | O(9)-V(15)-O(32)  | 98.0(3)  |
| V(7)-O(23)        | 2.129(8) | O(46)-V(15)-O(4)  | 164.0(3) |
| V(13)-O(40)       | 1.625(8) | O(8)-V(15)-O(4)   | 88.5(3)  |
| V(13)-O(39)       | 1.928(8) | O(34)-V(15)-O(4)  | 86.5(3)  |
| V(13)-O(28)       | 1.953(8) | O(9)-V(15)-O(4)   | 73.7(3)  |
| V(13)-O(14)       | 1.970(8) | O(32)-V(15)-O(4)  | 71.7(3)  |
| V(13)-O(18)       | 2.071(8) | O(30)-V(9)-O(25)  | 104.3(4) |
| V(2)-O(5)         | 1.632(9) | O(30)-V(9)-O(31)  | 102.8(4) |
| V(2)-O(7)         | 1.870(7) | O(25)-V(9)-O(31)  | 90.9(3)  |
| V(2)-O(8)         | 1.902(7) | O(30)-V(9)-O(21)  | 101.1(4) |
| V(2)-O(9)         | 2.024(8) | O(25)-V(9)-O(21)  | 84.0(3)  |
| V(2)-O(6)         | 2.026(8) | O(31)-V(9)-O(21)  | 156.1(3) |
| V(12)-O(37)       | 1.647(9) | O(30)-V(9)-O(32)  | 98.0(4)  |
| V(12)-O(39)       | 1.873(8) | O(25)-V(9)-O(32)  | 157.3(3) |
| V(12)-O(29)       | 1.884(8) | O(31)-V(9)-O(32)  | 79.9(3)  |
| V(12)-O(28)       | 1.970(8) | O(21)-V(9)-O(32)  | 96.1(3)  |
| V(12)-O(38)       | 2.106(8) | O(30)-V(9)-O(4)   | 165.0(4) |
| V(5)-O(17)        | 1.634(9) | O(25)-V(9)-O(4)   | 88.4(3)  |
| V(5)-O(14)        | 1.856(8) | O(31)-V(9)-O(4)   | 84.6(3)  |
| V(5)-O(12)        | 1.895(8) | O(21)-V(9)-O(4)   | 72.0(3)  |
| V(5)-O(11)        | 1.960(7) | O(32)-V(9)-O(4)   | 70.2(3)  |
| V(5)-O(18)        | 2.129(8) | O(45)-V(16)-O(44) | 105.3(4) |
|                   |          | O(45)-V(16)-O(35) | 102.2(4) |
| O(2)-V(1)-O(4)    | 109.0(4) | O(44)-V(16)-O(35) | 152.4(3) |
| O(2)-V(1)-O(1)    | 109.4(4) | O(45)-V(16)-O(34) | 103.5(4) |
| O(4)-V(1)-O(1)    | 108.8(4) | O(44)-V(16)-O(34) | 91.1(3)  |
| O(2)-V(1)-O(3)    | 108.9(4) | O(35)-V(16)-O(34) | 80.7(3)  |
| O(4)-V(1)-O(3)    | 110.5(4) | O(45)-V(16)-O(43) | 101.9(4) |
| O(1)-V(1)-O(3)    | 110.2(4) | O(44)-V(16)-O(43) | 80.2(3)  |
| O(46)-V(15)-O(8)  | 103.4(4) | O(35)-V(16)-O(43) | 96.0(3)  |
| O(46)-V(15)-O(34) | 103.6(3) | O(34)-V(16)-O(43) | 154.5(3) |
| O(8)-V(15)-O(34)  | 91.5(3)  | O(33)-V(10)-O(34) | 118.3(4) |

|                   |          |                   |          |
|-------------------|----------|-------------------|----------|
| O(33)-V(10)-O(31) | 118.9(4) | O(16)-V(11)-O(43) | 84.5(3)  |
| O(34)-V(10)-O(31) | 122.7(3) | O(39)-V(11)-O(43) | 156.0(3) |
| O(33)-V(10)-O(35) | 105.7(4) | O(41)-V(11)-O(38) | 98.0(4)  |
| O(34)-V(10)-O(35) | 83.4(3)  | O(16)-V(11)-O(38) | 156.0(3) |
| O(31)-V(10)-O(35) | 85.3(3)  | O(39)-V(11)-O(38) | 79.3(3)  |
| O(33)-V(10)-O(32) | 104.7(4) | O(43)-V(11)-O(38) | 96.9(3)  |
| O(34)-V(10)-O(32) | 81.8(3)  | O(41)-V(11)-O(2)  | 166.2(4) |
| O(31)-V(10)-O(32) | 80.5(3)  | O(16)-V(11)-O(2)  | 87.9(3)  |
| O(35)-V(10)-O(32) | 149.6(3) | O(39)-V(11)-O(2)  | 83.3(3)  |
| O(19)-V(6)-O(20)  | 103.9(4) | O(43)-V(11)-O(2)  | 73.2(3)  |
| O(19)-V(6)-O(21)  | 100.9(4) | O(38)-V(11)-O(2)  | 69.8(3)  |
| O(20)-V(6)-O(21)  | 83.3(3)  | O(27)-V(8)-O(29)  | 104.4(4) |
| O(19)-V(6)-O(7)   | 104.0(4) | O(27)-V(8)-O(28)  | 100.5(4) |
| O(20)-V(6)-O(7)   | 88.5(3)  | O(29)-V(8)-O(28)  | 83.1(3)  |
| O(21)-V(6)-O(7)   | 155.0(3) | O(27)-V(8)-O(25)  | 102.5(4) |
| O(19)-V(6)-O(9)   | 99.9(4)  | O(29)-V(8)-O(25)  | 91.6(3)  |
| O(20)-V(6)-O(9)   | 155.8(3) | O(28)-V(8)-O(25)  | 157.1(3) |
| O(21)-V(6)-O(9)   | 96.5(3)  | O(27)-V(8)-O(23)  | 96.5(4)  |
| O(7)-V(6)-O(9)    | 81.5(3)  | O(29)-V(8)-O(23)  | 158.5(3) |
| O(47)-V(18)-O(8)  | 102.3(4) | O(28)-V(8)-O(23)  | 98.2(3)  |
| O(47)-V(18)-O(44) | 102.3(4) | O(25)-V(8)-O(23)  | 78.8(3)  |
| O(8)-V(18)-O(44)  | 92.8(3)  | O(27)-V(8)-O(3)   | 162.4(4) |
| O(47)-V(18)-O(6)  | 98.8(4)  | O(29)-V(8)-O(3)   | 90.9(3)  |
| O(8)-V(18)-O(6)   | 81.9(3)  | O(28)-V(8)-O(3)   | 72.6(3)  |
| O(44)-V(18)-O(6)  | 159.0(3) | O(25)-V(8)-O(3)   | 85.3(3)  |
| O(47)-V(18)-O(15) | 97.8(4)  | O(23)-V(8)-O(3)   | 69.3(3)  |
| O(8)-V(18)-O(15)  | 159.8(3) | O(36)-V(17)-O(31) | 103.0(4) |
| O(44)-V(18)-O(15) | 81.2(3)  | O(36)-V(17)-O(29) | 101.7(4) |
| O(6)-V(18)-O(15)  | 96.9(3)  | O(31)-V(17)-O(29) | 91.9(3)  |
| O(47)-V(18)-O(1)  | 164.5(4) | O(36)-V(17)-O(35) | 100.5(4) |
| O(8)-V(18)-O(1)   | 89.4(3)  | O(31)-V(17)-O(35) | 83.7(3)  |
| O(44)-V(18)-O(1)  | 87.1(3)  | O(29)-V(17)-O(35) | 157.8(3) |
| O(6)-V(18)-O(1)   | 72.5(3)  | O(36)-V(17)-O(38) | 96.9(4)  |
| O(15)-V(18)-O(1)  | 71.2(3)  | O(31)-V(17)-O(38) | 159.6(3) |
| O(41)-V(11)-O(16) | 105.1(4) | O(29)-V(17)-O(38) | 79.5(3)  |
| O(41)-V(11)-O(39) | 101.2(4) | O(35)-V(17)-O(38) | 97.2(3)  |
| O(16)-V(11)-O(39) | 89.7(3)  | O(36)-V(17)-O(2)  | 164.8(4) |
| O(41)-V(11)-O(43) | 102.8(4) | O(31)-V(17)-O(2)  | 90.6(3)  |

|                   |          |                   |          |
|-------------------|----------|-------------------|----------|
| O(29)-V(17)-O(2)  | 84.3(3)  | O(26)-V(19)-O(3)  | 163.8(4) |
| O(35)-V(17)-O(2)  | 74.1(3)  | O(12)-V(19)-O(3)  | 89.6(3)  |
| O(38)-V(17)-O(2)  | 70.3(3)  | O(20)-V(19)-O(3)  | 89.0(3)  |
| O(13)-V(4)-O(14)  | 105.9(4) | O(23)-V(19)-O(3)  | 74.5(3)  |
| O(13)-V(4)-O(16)  | 102.0(4) | O(18)-V(19)-O(3)  | 75.4(3)  |
| O(14)-V(4)-O(16)  | 90.2(3)  | O(42)-V(14)-O(16) | 117.3(4) |
| O(13)-V(4)-O(11)  | 102.9(4) | O(42)-V(14)-O(44) | 120.9(4) |
| O(14)-V(4)-O(11)  | 84.1(3)  | O(16)-V(14)-O(44) | 121.0(3) |
| O(16)-V(4)-O(11)  | 155.1(3) | O(42)-V(14)-O(43) | 109.7(4) |
| O(13)-V(4)-O(15)  | 97.8(4)  | O(16)-V(14)-O(43) | 87.8(3)  |
| O(14)-V(4)-O(15)  | 155.6(3) | O(44)-V(14)-O(43) | 81.9(3)  |
| O(16)-V(4)-O(15)  | 79.4(3)  | O(42)-V(14)-O(15) | 100.7(4) |
| O(11)-V(4)-O(15)  | 96.0(3)  | O(16)-V(14)-O(15) | 79.7(3)  |
| O(10)-V(3)-O(12)  | 101.6(4) | O(44)-V(14)-O(15) | 81.0(3)  |
| O(10)-V(3)-O(7)   | 102.0(4) | O(43)-V(14)-O(15) | 149.6(3) |
| O(12)-V(3)-O(7)   | 92.0(3)  | O(22)-V(7)-O(25)  | 120.2(4) |
| O(10)-V(3)-O(11)  | 99.3(4)  | O(22)-V(7)-O(20)  | 117.9(4) |
| O(12)-V(3)-O(11)  | 80.6(3)  | O(25)-V(7)-O(20)  | 121.2(3) |
| O(7)-V(3)-O(11)   | 158.5(3) | O(22)-V(7)-O(21)  | 106.3(4) |
| O(10)-V(3)-O(6)   | 100.4(4) | O(25)-V(7)-O(21)  | 86.5(3)  |
| O(12)-V(3)-O(6)   | 157.9(3) | O(20)-V(7)-O(21)  | 85.2(3)  |
| O(7)-V(3)-O(6)    | 81.1(3)  | O(22)-V(7)-O(23)  | 101.9(4) |
| O(11)-V(3)-O(6)   | 98.1(3)  | O(25)-V(7)-O(23)  | 80.0(3)  |
| O(10)-V(3)-O(1)   | 166.4(4) | O(20)-V(7)-O(23)  | 80.9(3)  |
| O(12)-V(3)-O(1)   | 87.9(3)  | O(21)-V(7)-O(23)  | 151.8(3) |
| O(7)-V(3)-O(1)    | 87.2(3)  | O(40)-V(13)-O(39) | 103.3(4) |
| O(11)-V(3)-O(1)   | 72.4(3)  | O(40)-V(13)-O(28) | 102.4(4) |
| O(6)-V(3)-O(1)    | 70.8(3)  | O(39)-V(13)-O(28) | 84.1(3)  |
| O(26)-V(19)-O(12) | 101.3(4) | O(40)-V(13)-O(14) | 102.3(4) |
| O(26)-V(19)-O(20) | 102.0(4) | O(39)-V(13)-O(14) | 91.1(3)  |
| O(12)-V(19)-O(20) | 94.1(3)  | O(28)-V(13)-O(14) | 155.3(3) |
| O(26)-V(19)-O(23) | 95.1(4)  | O(40)-V(13)-O(18) | 99.4(4)  |
| O(12)-V(19)-O(23) | 163.6(3) | O(39)-V(13)-O(18) | 156.7(3) |
| O(20)-V(19)-O(23) | 81.6(3)  | O(28)-V(13)-O(18) | 96.1(3)  |
| O(26)-V(19)-O(18) | 94.3(4)  | O(14)-V(13)-O(18) | 79.0(3)  |
| O(12)-V(19)-O(18) | 81.2(3)  | O(5)-V(2)-O(7)    | 119.1(4) |
| O(20)-V(19)-O(18) | 163.7(3) | O(5)-V(2)-O(8)    | 118.7(4) |
| O(23)-V(19)-O(18) | 98.6(3)  | O(7)-V(2)-O(8)    | 122.2(3) |



|                   |          |                   |          |
|-------------------|----------|-------------------|----------|
| O(5)-V(2)-O(9)    | 104.5(4) | O(39)-V(12)-O(38) | 80.0(3)  |
| O(7)-V(2)-O(9)    | 84.0(3)  | O(29)-V(12)-O(38) | 80.8(3)  |
| O(8)-V(2)-O(9)    | 82.5(3)  | O(28)-V(12)-O(38) | 149.8(3) |
| O(5)-V(2)-O(6)    | 104.4(4) | O(17)-V(5)-O(14)  | 120.0(6) |
| O(7)-V(2)-O(6)    | 83.5(3)  | O(17)-V(5)-O(12)  | 120.6(6) |
| O(8)-V(2)-O(6)    | 82.4(3)  | O(14)-V(5)-O(12)  | 118.8(3) |
| O(9)-V(2)-O(6)    | 151.1(3) | O(17)-V(5)-O(11)  | 108.2(5) |
| O(37)-V(12)-O(39) | 118.5(5) | O(14)-V(5)-O(11)  | 86.0(3)  |
| O(37)-V(12)-O(29) | 119.1(5) | O(12)-V(5)-O(11)  | 83.0(3)  |
| O(39)-V(12)-O(29) | 121.7(3) | O(17)-V(5)-O(18)  | 102.6(5) |
| O(37)-V(12)-O(28) | 108.8(5) | O(14)-V(5)-O(18)  | 80.0(3)  |
| O(39)-V(12)-O(28) | 85.1(3)  | O(12)-V(5)-O(18)  | 79.9(3)  |
| O(29)-V(12)-O(28) | 85.0(3)  | O(11)-V(5)-O(18)  | 149.2(3) |
| O(37)-V(12)-O(38) | 101.4(4) |                   |          |

Symmetry transformations used to generate equivalent atoms: #1  $x, -y+2, z+1/2$  #2  $x, -y+2, z-1/2$  #3  $x+1/2, y+1/2, z$  #4  $x+1/2, -y+3/2, z-1/2$  #5  $x, -y+1, z-1/2$  #6  $x-1/2, -y+3/2, z-1/2$  #7  $x, -y+1, z+1/2$  #8  $x-1/2, y+1/2, z$  #9  $x-1/2, -y+3/2, z+1/2$  #10  $x-1/2, y-1/2, z$  #11  $x+1/2, -y+3/2, z+1/2$  #12  $x+1/2, y-1/2, z$

**Table S2.** Bond distances (Å) and angles (°) for compound **2**

|              |          |              |          |
|--------------|----------|--------------|----------|
| V(1)-O(1)    | 1.626(4) | V(9)-O(15)   | 1.945(4) |
| V(1)-O(2)    | 1.933(4) | V(9)-O(14)   | 1.946(4) |
| V(1)-O(4)    | 1.940(4) | V(9)-O(10)#1 | 1.955(4) |
| V(1)-O(5)    | 1.943(4) | V(5)-O(21)   | 1.633(4) |
| V(1)-O(3)    | 1.960(4) | V(5)-O(8)    | 1.920(4) |
| V(3)-O(7)    | 1.614(4) | V(5)-O(5)    | 1.924(4) |
| V(3)-O(8)    | 1.953(4) | V(5)-O(13)   | 1.954(4) |
| V(3)-O(4)    | 1.956(4) | V(5)-O(19)   | 1.960(4) |
| V(3)-O(17)#1 | 1.957(4) | V(6)-O(20)   | 1.613(4) |
| V(3)-O(9)    | 1.958(4) | V(6)-O(3)#1  | 1.883(4) |
| V(7)-O(18)   | 1.624(4) | V(6)-O(19)   | 1.893(4) |
| V(7)-O(15)   | 1.940(4) | V(6)-O(5)    | 1.931(4) |
| V(7)-O(2)#1  | 1.951(4) | V(6)-O(3)    | 1.952(4) |
| V(7)-O(13)   | 1.951(4) | V(2)-O(6)    | 1.636(4) |
| V(7)-O(19)   | 1.957(4) | V(2)-O(2)    | 1.917(4) |
| V(9)-O(16)   | 1.624(4) | V(2)-O(15)#1 | 1.935(4) |
| V(9)-O(17)   | 1.939(4) | V(2)-O(17)#1 | 1.940(4) |

|                   |            |                    |            |
|-------------------|------------|--------------------|------------|
| V(2)-O(4)         | 1.948(4)   | O(18)-V(7)-O(19)   | 104.84(19) |
| V(4)-O(12)        | 1.626(4)   | O(15)-V(7)-O(19)   | 149.89(16) |
| V(4)-O(14)        | 1.918(4)   | O(2)#1-V(7)-O(19)  | 90.35(15)  |
| V(4)-O(13)        | 1.941(4)   | O(13)-V(7)-O(19)   | 79.41(15)  |
| V(4)-O(9)         | 1.946(4)   | O(16)-V(9)-O(17)   | 104.09(19) |
| V(4)-O(8)         | 1.948(4)   | O(16)-V(9)-O(15)   | 107.23(19) |
| V(8)-O(11)        | 1.606(4)   | O(17)-V(9)-O(15)   | 80.97(15)  |
| V(8)-O(9)         | 1.875(4)   | O(16)-V(9)-O(14)   | 108.80(19) |
| V(8)-O(10)        | 1.881(4)   | O(17)-V(9)-O(14)   | 147.09(16) |
| V(8)-O(14)        | 1.912(4)   | O(15)-V(9)-O(14)   | 90.25(16)  |
| V(8)-O(10)#1      | 1.952(4)   | O(16)-V(9)-O(10)#1 | 105.61(19) |
|                   |            | O(17)-V(9)-O(10)#1 | 91.74(15)  |
| O(1)-V(1)-O(2)    | 104.98(18) | O(15)-V(9)-O(10)#1 | 147.16(16) |
| O(1)-V(1)-O(4)    | 105.52(19) | O(14)-V(9)-O(10)#1 | 78.61(16)  |
| O(2)-V(1)-O(4)    | 83.39(15)  | O(21)-V(5)-O(8)    | 106.29(19) |
| O(1)-V(1)-O(5)    | 107.60(18) | O(21)-V(5)-O(5)    | 107.8(2)   |
| O(2)-V(1)-O(5)    | 147.25(16) | O(8)-V(5)-O(5)     | 94.54(16)  |
| O(4)-V(1)-O(5)    | 91.03(16)  | O(21)-V(5)-O(13)   | 110.20(19) |
| O(1)-V(1)-O(3)    | 105.56(19) | O(8)-V(5)-O(13)    | 82.17(16)  |
| O(2)-V(1)-O(3)    | 88.70(15)  | O(5)-V(5)-O(13)    | 141.24(16) |
| O(4)-V(1)-O(3)    | 148.92(16) | O(21)-V(5)-O(19)   | 110.31(19) |
| O(5)-V(1)-O(3)    | 79.59(15)  | O(8)-V(5)-O(19)    | 142.79(16) |
| O(7)-V(3)-O(8)    | 106.75(18) | O(5)-V(5)-O(19)    | 80.70(15)  |
| O(7)-V(3)-O(4)    | 104.63(19) | O(13)-V(5)-O(19)   | 79.28(15)  |
| O(8)-V(3)-O(4)    | 92.30(16)  | O(20)-V(6)-O(3)#1  | 105.9(2)   |
| O(7)-V(3)-O(17)#1 | 103.55(18) | O(20)-V(6)-O(19)   | 106.0(2)   |
| O(8)-V(3)-O(17)#1 | 149.69(16) | O(3)#1-V(6)-O(19)  | 96.41(16)  |
| O(4)-V(3)-O(17)#1 | 80.49(15)  | O(20)-V(6)-O(5)    | 108.6(2)   |
| O(7)-V(3)-O(9)    | 106.77(19) | O(3)#1-V(6)-O(5)   | 144.44(16) |
| O(8)-V(3)-O(9)    | 79.65(16)  | O(19)-V(6)-O(5)    | 82.25(16)  |
| O(4)-V(3)-O(9)    | 148.59(16) | O(20)-V(6)-O(3)    | 107.3(2)   |
| O(17)#1-V(3)-O(9) | 91.26(15)  | O(3)#1-V(6)-O(3)   | 81.76(17)  |
| O(18)-V(7)-O(15)  | 105.25(19) | O(19)-V(6)-O(3)    | 145.75(16) |
| O(18)-V(7)-O(2)#1 | 105.73(18) | O(5)-V(6)-O(3)     | 80.08(15)  |
| O(15)-V(7)-O(2)#1 | 82.51(15)  | O(6)-V(2)-O(2)     | 111.8(2)   |
| O(18)-V(7)-O(13)  | 104.29(18) | O(6)-V(2)-O(15)#1  | 110.44(18) |
| O(15)-V(7)-O(13)  | 92.23(16)  | O(2)-V(2)-O(15)#1  | 83.53(15)  |
| O(2)#1-V(7)-O(13) | 149.86(15) | O(6)-V(2)-O(17)#1  | 111.8(2)   |

|                      |            |                     |            |
|----------------------|------------|---------------------|------------|
| O(2)-V(2)-O(17)#1    | 136.45(16) | O(13)-V(4)-O(8)     | 81.78(15)  |
| O(15)#1-V(2)-O(17)#1 | 81.18(16)  | O(9)-V(4)-O(8)      | 80.06(16)  |
| O(6)-V(2)-O(4)       | 111.57(18) | O(11)-V(8)-O(9)     | 107.8(2)   |
| O(2)-V(2)-O(4)       | 83.60(15)  | O(11)-V(8)-O(10)    | 106.7(2)   |
| O(15)#1-V(2)-O(4)    | 137.90(16) | O(9)-V(8)-O(10)     | 93.30(17)  |
| O(17)#1-V(2)-O(4)    | 81.12(15)  | O(11)-V(8)-O(14)    | 109.2(2)   |
| O(12)-V(4)-O(14)     | 106.7(2)   | O(9)-V(8)-O(14)     | 83.47(17)  |
| O(12)-V(4)-O(13)     | 105.84(19) | O(10)-V(8)-O(14)    | 143.20(17) |
| O(14)-V(4)-O(13)     | 94.13(16)  | O(11)-V(8)-O(10)#1  | 107.8(2)   |
| O(12)-V(4)-O(9)      | 110.7(2)   | O(9)-V(8)-O(10)#1   | 143.92(17) |
| O(14)-V(4)-O(9)      | 81.46(17)  | O(10)-V(8)-O(10)#1  | 82.13(17)  |
| O(13)-V(4)-O(9)      | 142.94(16) | O(14)-V(8)-O(10)#1  | 79.48(16)  |
| O(12)-V(4)-O(8)      | 110.2(2)   | O(30)-Na(3)-O(22)#1 | 89.5(2)    |
| O(14)-V(4)-O(8)      | 142.58(16) | O(28)-Na(3)-O(6)#1  | 89.80(18)  |

---

Symmetry transformations used to generate equivalent atoms: #1  $y, x, -z+1$  #2  $x-1, y, z$  #3  $x-y, -y, -z+2/3$  #4  $x+1, y, z$

Section S3. Thermogravimetric analyses (TGA) of compounds 1 and 2

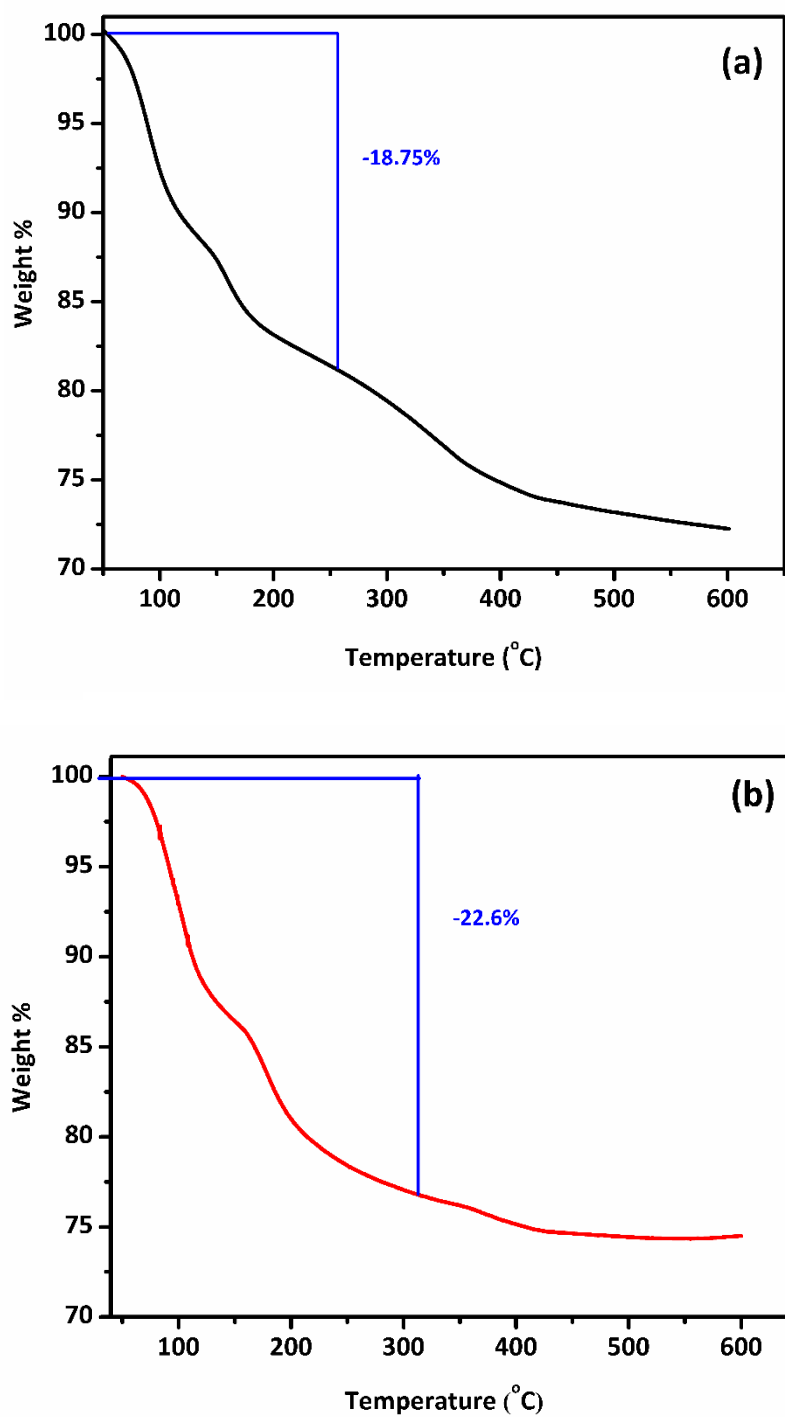

Fig. S5 Thermogravimetric profiles of compound 1 (Fig. a) and compound 2 (Fig. b).

## Section S4. Bond valence sum calculations on the crystal structures of compounds 1 and 2

### Compound 1

Bond valence calculation. Numbers in brackets after atom symbols are at.no., r and c - see O'Keeffe and Brese, *J.A.C.S.* 1991, 113, 3226.

.....V106

| V (23, 1.21, 1.45) |      | Rij  | Dij  | Vij |
|--------------------|------|------|------|-----|
| -O ( 8, .63, 3.15) | 1.77 | 1.63 | 1.47 |     |
| -O ( 8, .63, 3.15) | 1.77 | 2.00 | .54  |     |
| -O ( 8, .63, 3.15) | 1.77 | 1.96 | .61  |     |
| -O ( 8, .63, 3.15) | 1.77 | 1.97 | .59  |     |
| -O ( 8, .63, 3.15) | 1.77 | 2.02 | .51  |     |
| -O ( 8, .63, 3.15) | 1.77 | 2.40 | .18  |     |

Bond valence sum for V 3.90

.....V206

| V (23, 1.21, 1.45) |      | Rij  | Dij  | Vij |
|--------------------|------|------|------|-----|
| -O ( 8, .63, 3.15) | 1.77 | 1.61 | 1.54 |     |
| -O ( 8, .63, 3.15) | 1.77 | 1.98 | .57  |     |
| -O ( 8, .63, 3.15) | 1.77 | 2.06 | .46  |     |
| -O ( 8, .63, 3.15) | 1.77 | 1.94 | .64  |     |
| -O ( 8, .63, 3.15) | 1.77 | 1.94 | .64  |     |
| -O ( 8, .63, 3.15) | 1.77 | 2.39 | .19  |     |

Bond valence sum for V 4.04

.....V306

| V (23, 1.21, 1.45) |      | Rij  | Dij  | Vij |
|--------------------|------|------|------|-----|
| -O ( 8, .63, 3.15) | 1.77 | 1.62 | 1.51 |     |
| -O ( 8, .63, 3.15) | 1.77 | 1.99 | .55  |     |
| -O ( 8, .63, 3.15) | 1.77 | 2.06 | .46  |     |
| -O ( 8, .63, 3.15) | 1.77 | 1.94 | .64  |     |
| -O ( 8, .63, 3.15) | 1.77 | 1.93 | .66  |     |
| -O ( 8, .63, 3.15) | 1.77 | 2.46 | .16  |     |

Bond valence sum for V 3.98

.....V405

| V (23, 1.21, 1.45) |      | Rij  | Dij  | Vij |
|--------------------|------|------|------|-----|
| -O ( 8, .63, 3.15) | 1.77 | 1.64 | 1.43 |     |
| -O ( 8, .63, 3.15) | 1.77 | 2.08 | .43  |     |
| -O ( 8, .63, 3.15) | 1.77 | 1.86 | .79  |     |

|    |                 |      |      |     |
|----|-----------------|------|------|-----|
| -O | ( 8, .63, 3.15) | 1.77 | 1.95 | .62 |
| -O | ( 8, .63, 3.15) | 1.77 | 1.90 | .70 |

Bond valence sum for V 3.98

.....V506

|    |                  |      |      |      |     |
|----|------------------|------|------|------|-----|
| V  | (23, 1.21, 1.45) |      | Rij  | Dij  | Vij |
| -O | ( 8, .63, 3.15)  | 1.77 | 1.63 | 1.48 |     |
| -O | ( 8, .63, 3.15)  | 1.77 | 1.93 | .65  |     |
| -O | ( 8, .63, 3.15)  | 1.77 | 2.00 | .55  |     |
| -O | ( 8, .63, 3.15)  | 1.77 | 2.05 | .48  |     |
| -O | ( 8, .63, 3.15)  | 1.77 | 1.96 | .61  |     |
| -O | ( 8, .63, 3.15)  | 1.77 | 2.45 | .16  |     |

Bond valence sum for V 3.92

.....V606

|    |                  |      |      |      |     |
|----|------------------|------|------|------|-----|
| V  | (23, 1.21, 1.45) |      | Rij  | Dij  | Vij |
| -O | ( 8, .63, 3.15)  | 1.77 | 1.63 | 1.46 |     |
| -O | ( 8, .63, 3.15)  | 1.77 | 2.06 | .46  |     |
| -O | ( 8, .63, 3.15)  | 1.77 | 1.96 | .60  |     |
| -O | ( 8, .63, 3.15)  | 1.77 | 1.93 | .65  |     |
| -O | ( 8, .63, 3.15)  | 1.77 | 1.99 | .56  |     |
| -O | ( 8, .63, 3.15)  | 1.77 | 2.33 | .22  |     |

Bond valence sum for V 3.96

.....V705

|    |                  |      |      |      |     |
|----|------------------|------|------|------|-----|
| V  | (23, 1.21, 1.45) |      | Rij  | Dij  | Vij |
| -O | ( 8, .63, 3.15)  | 1.77 | 1.62 | 1.51 |     |
| -O | ( 8, .63, 3.15)  | 1.77 | 2.00 | .55  |     |
| -O | ( 8, .63, 3.15)  | 1.77 | 1.94 | .64  |     |
| -O | ( 8, .63, 3.15)  | 1.77 | 1.99 | .56  |     |
| -O | ( 8, .63, 3.15)  | 1.77 | 1.98 | .57  |     |

Bond valence sum for V 3.84

.....V805

|    |                  |      |      |      |     |
|----|------------------|------|------|------|-----|
| V  | (23, 1.21, 1.45) |      | Rij  | Dij  | Vij |
| -O | ( 8, .63, 3.15)  | 1.77 | 1.63 | 1.46 |     |
| -O | ( 8, .63, 3.15)  | 1.77 | 1.88 | .75  |     |
| -O | ( 8, .63, 3.15)  | 1.77 | 2.00 | .55  |     |
| -O | ( 8, .63, 3.15)  | 1.77 | 1.89 | .72  |     |
| -O | ( 8, .63, 3.15)  | 1.77 | 2.08 | .44  |     |

Bond valence sum for V 3.92

.....V906

| V (23, 1.21, 1.45) |      | Rij  | Dij  | Vij |
|--------------------|------|------|------|-----|
| -O ( 8, .63, 3.15) | 1.77 | 1.63 | 1.49 |     |
| -O ( 8, .63, 3.15) | 1.77 | 1.96 | .60  |     |
| -O ( 8, .63, 3.15) | 1.77 | 2.07 | .45  |     |
| -O ( 8, .63, 3.15) | 1.77 | 1.94 | .64  |     |
| -O ( 8, .63, 3.15) | 1.77 | 1.98 | .57  |     |
| -O ( 8, .63, 3.15) | 1.77 | 2.45 | .16  |     |

Bond valence sum for V 3.91

.....V1006

| V (23, 1.21, 1.45) |      | Rij  | Dij  | Vij |
|--------------------|------|------|------|-----|
| -O ( 8, .63, 3.15) | 1.77 | 1.62 | 1.50 |     |
| -O ( 8, .63, 3.15) | 1.77 | 1.95 | .62  |     |
| -O ( 8, .63, 3.15) | 1.77 | 1.95 | .62  |     |
| -O ( 8, .63, 3.15) | 1.77 | 2.06 | .47  |     |
| -O ( 8, .63, 3.15) | 1.77 | 2.05 | .47  |     |
| -O ( 8, .63, 3.15) | 1.77 | 2.33 | .22  |     |

Bond valence sum for V 3.90

.....V1105

| V (23, 1.21, 1.45) |      | Rij  | Dij  | Vij |
|--------------------|------|------|------|-----|
| -O ( 8, .63, 3.15) | 1.77 | 1.61 | 1.54 |     |
| -O ( 8, .63, 3.15) | 1.77 | 1.96 | .61  |     |
| -O ( 8, .63, 3.15) | 1.77 | 2.05 | .48  |     |
| -O ( 8, .63, 3.15) | 1.77 | 1.96 | .60  |     |
| -O ( 8, .63, 3.15) | 1.77 | 1.95 | .62  |     |

Bond valence sum for V 3.85

.....V1206

| V (23, 1.21, 1.45) |      | Rij  | Dij  | Vij |
|--------------------|------|------|------|-----|
| -O ( 8, .63, 3.15) | 1.77 | 1.62 | 1.52 |     |
| -O ( 8, .63, 3.15) | 1.77 | 1.93 | .65  |     |
| -O ( 8, .63, 3.15) | 1.77 | 1.99 | .56  |     |
| -O ( 8, .63, 3.15) | 1.77 | 2.09 | .43  |     |
| -O ( 8, .63, 3.15) | 1.77 | 1.98 | .57  |     |
| -O ( 8, .63, 3.15) | 1.77 | 2.42 | .17  |     |

Bond valence sum for V 3.91

.....V1305

| V (23, 1.21, 1.45) |      | Rij  | Dij  | Vij |
|--------------------|------|------|------|-----|
| -O ( 8, .63, 3.15) | 1.77 | 1.65 | 1.40 |     |
| -O ( 8, .63, 3.15) | 1.77 | 2.14 | .37  |     |
| -O ( 8, .63, 3.15) | 1.77 | 1.89 | .74  |     |
| -O ( 8, .63, 3.15) | 1.77 | 1.96 | .61  |     |
| -O ( 8, .63, 3.15) | 1.77 | 1.89 | .73  |     |

Bond valence sum for V 3.85

.....V1406

| V (23, 1.21, 1.45) |      | Rij  | Dij  | Vij |
|--------------------|------|------|------|-----|
| -O ( 8, .63, 3.15) | 1.77 | 1.67 | 1.33 |     |
| -O ( 8, .63, 3.15) | 1.77 | 1.91 | .70  |     |
| -O ( 8, .63, 3.15) | 1.77 | 1.93 | .65  |     |
| -O ( 8, .63, 3.15) | 1.77 | 2.05 | .48  |     |
| -O ( 8, .63, 3.15) | 1.77 | 2.08 | .43  |     |
| -O ( 8, .63, 3.15) | 1.77 | 2.19 | .32  |     |

Bond valence sum for V 3.92

.....V1505

| V (23, 1.21, 1.45) |      | Rij  | Dij  | Vij |
|--------------------|------|------|------|-----|
| -O ( 8, .63, 3.15) | 1.77 | 1.62 | 1.54 |     |
| -O ( 8, .63, 3.15) | 1.77 | 1.96 | .61  |     |
| -O ( 8, .63, 3.15) | 1.77 | 1.93 | .66  |     |
| -O ( 8, .63, 3.15) | 1.77 | 1.96 | .61  |     |
| -O ( 8, .63, 3.15) | 1.77 | 2.06 | .46  |     |

Bond valence sum for V 3.88

.....V1605

| V (23, 1.21, 1.45) |      | Rij  | Dij  | Vij |
|--------------------|------|------|------|-----|
| -O ( 8, .63, 3.15) | 1.77 | 1.64 | 1.43 |     |
| -O ( 8, .63, 3.15) | 1.77 | 1.89 | .73  |     |
| -O ( 8, .63, 3.15) | 1.77 | 2.02 | .51  |     |
| -O ( 8, .63, 3.15) | 1.77 | 1.88 | .74  |     |
| -O ( 8, .63, 3.15) | 1.77 | 2.12 | .40  |     |

Bond valence sum for V 3.81

.....V1705



| V  | (23, 1.21, 1.45) |  | Rij  | Dij  | Vij  |
|----|------------------|--|------|------|------|
| -O | ( 8, .63, 3.15)  |  | 1.77 | 1.65 | 1.39 |
| -O | ( 8, .63, 3.15)  |  | 1.77 | 2.10 | .41  |
| -O | ( 8, .63, 3.15)  |  | 1.77 | 1.88 | .75  |
| -O | ( 8, .63, 3.15)  |  | 1.77 | 1.88 | .75  |
| -O | ( 8, .63, 3.15)  |  | 1.77 | 1.95 | .61  |

Bond valence sum for V 3.91

.....V1805

| V  | (23, 1.21, 1.45) |  | Rij  | Dij  | Vij  |
|----|------------------|--|------|------|------|
| -O | ( 8, .63, 3.15)  |  | 1.77 | 1.64 | 1.43 |
| -O | ( 8, .63, 3.15)  |  | 1.77 | 1.99 | .56  |
| -O | ( 8, .63, 3.15)  |  | 1.77 | 1.88 | .76  |
| -O | ( 8, .63, 3.15)  |  | 1.77 | 1.90 | .71  |
| -O | ( 8, .63, 3.15)  |  | 1.77 | 2.11 | .40  |

Bond valence sum for V 3.87

.....V1904

| V  | (23, 1.21, 1.45) |  | Rij  | Dij  | Vij  |
|----|------------------|--|------|------|------|
| -O | ( 8, .63, 3.15)  |  | 1.77 | 1.70 | 1.21 |
| -O | ( 8, .63, 3.15)  |  | 1.77 | 1.70 | 1.22 |
| -O | ( 8, .63, 3.15)  |  | 1.77 | 1.73 | 1.13 |
| -O | ( 8, .63, 3.15)  |  | 1.77 | 1.72 | 1.16 |

Bond valence sum for V 4.72

## Compound 2

Bond valence calculation. Numbers in brackets after atom symbols are at.no., r and c - see O'Keefe and Brese, J.A.C.S. 1991, 113, 3226

.....V1

| V  | (23, 1.21, 1.45) |  | Rij  | Dij  | Vij  |
|----|------------------|--|------|------|------|
| -O | ( 8, .63, 3.15)  |  | 1.77 | 1.96 | .61  |
| -O | ( 8, .63, 3.15)  |  | 1.77 | 1.97 | .59  |
| -O | ( 8, .63, 3.15)  |  | 1.77 | 1.95 | .62  |
| -O | ( 8, .63, 3.15)  |  | 1.77 | 1.94 | .63  |
| -O | ( 8, .63, 3.15)  |  | 1.77 | 1.63 | 1.49 |

Bond valence sum for V 3.93

.....V2

| V (23, 1.21, 1.45) |      | Rij  | Dij  | Vij |
|--------------------|------|------|------|-----|
| -O ( 8, .63, 3.15) | 1.77 | 1.96 | .61  |     |
| -O ( 8, .63, 3.15) | 1.77 | 1.97 | .60  |     |
| -O ( 8, .63, 3.15) | 1.77 | 1.96 | .61  |     |
| -O ( 8, .63, 3.15) | 1.77 | 1.96 | .61  |     |
| -O ( 8, .63, 3.15) | 1.77 | 1.62 | 1.52 |     |

Bond valence sum for V 3.94

.....V3

| V (23, 1.21, 1.45) |      | Rij  | Dij  | Vij |
|--------------------|------|------|------|-----|
| -O ( 8, .63, 3.15) | 1.77 | 1.94 | .63  |     |
| -O ( 8, .63, 3.15) | 1.77 | 1.95 | .61  |     |
| -O ( 8, .63, 3.15) | 1.77 | 1.95 | .61  |     |
| -O ( 8, .63, 3.15) | 1.77 | 1.92 | .67  |     |
| -O ( 8, .63, 3.15) | 1.77 | 1.63 | 1.48 |     |

Bond valence sum for V 4.01

.....V4

| V (23, 1.21, 1.45) |      | Rij  | Dij  | Vij |
|--------------------|------|------|------|-----|
| -O ( 8, .63, 3.15) | 1.77 | 1.96 | .61  |     |
| -O ( 8, .63, 3.15) | 1.77 | 1.90 | .71  |     |
| -O ( 8, .63, 3.15) | 1.77 | 1.88 | .75  |     |
| -O ( 8, .63, 3.15) | 1.77 | 1.94 | .64  |     |
| -O ( 8, .63, 3.15) | 1.77 | 1.61 | 1.55 |     |

Bond valence sum for V 4.26

.....V5

| V (23, 1.21, 1.45) |      | Rij  | Dij  | Vij |
|--------------------|------|------|------|-----|
| -O ( 8, .63, 3.15) | 1.77 | 1.96 | .60  |     |
| -O ( 8, .63, 3.15) | 1.77 | 1.89 | .72  |     |
| -O ( 8, .63, 3.15) | 1.77 | 1.92 | .68  |     |
| -O ( 8, .63, 3.15) | 1.77 | 1.89 | .73  |     |
| -O ( 8, .63, 3.15) | 1.77 | 1.60 | 1.58 |     |

Bond valence sum for V 4.32

.....V6

| V (23, 1.21, 1.45) |  | Rij | Dij | Vij |
|--------------------|--|-----|-----|-----|
|--------------------|--|-----|-----|-----|

|    |                 |      |      |      |
|----|-----------------|------|------|------|
| -O | ( 8, .63, 3.15) | 1.77 | 1.94 | .64  |
| -O | ( 8, .63, 3.15) | 1.77 | 1.96 | .61  |
| -O | ( 8, .63, 3.15) | 1.77 | 1.95 | .62  |
| -O | ( 8, .63, 3.15) | 1.77 | 1.95 | .62  |
| -O | ( 8, .63, 3.15) | 1.77 | 1.62 | 1.51 |

Bond valence sum for V 3.99

.....V7

| V (23, 1.21, 1.45) |                 | Rij  | Dij  | Vij  |
|--------------------|-----------------|------|------|------|
| -O                 | ( 8, .63, 3.15) | 1.77 | 1.93 | .65  |
| -O                 | ( 8, .63, 3.15) | 1.77 | 1.95 | .62  |
| -O                 | ( 8, .63, 3.15) | 1.77 | 1.95 | .63  |
| -O                 | ( 8, .63, 3.15) | 1.77 | 1.98 | .58  |
| -O                 | ( 8, .63, 3.15) | 1.77 | 1.62 | 1.51 |

Bond valence sum for V 3.98

.....V8

| V (23, 1.21, 1.45) |                 | Rij  | Dij  | Vij  |
|--------------------|-----------------|------|------|------|
| -O                 | ( 8, .63, 3.15) | 1.77 | 1.92 | .67  |
| -O                 | ( 8, .63, 3.15) | 1.77 | 1.97 | .59  |
| -O                 | ( 8, .63, 3.15) | 1.77 | 1.96 | .60  |
| -O                 | ( 8, .63, 3.15) | 1.77 | 1.92 | .67  |
| -O                 | ( 8, .63, 3.15) | 1.77 | 1.64 | 1.43 |

Bond valence sum for V 3.96

.....V9

| V (23, 1.21, 1.45) |                 | Rij  | Dij  | Vij  |
|--------------------|-----------------|------|------|------|
| -O                 | ( 8, .63, 3.15) | 1.77 | 1.95 | .63  |
| -O                 | ( 8, .63, 3.15) | 1.77 | 1.92 | .67  |
| -O                 | ( 8, .63, 3.15) | 1.77 | 1.93 | .65  |
| -O                 | ( 8, .63, 3.15) | 1.77 | 1.94 | .63  |
| -O                 | ( 8, .63, 3.15) | 1.77 | 1.64 | 1.45 |

Bond valence sum for V 4.03

## Section S5. X-ray photoelectron spectra for compounds 1 and 2

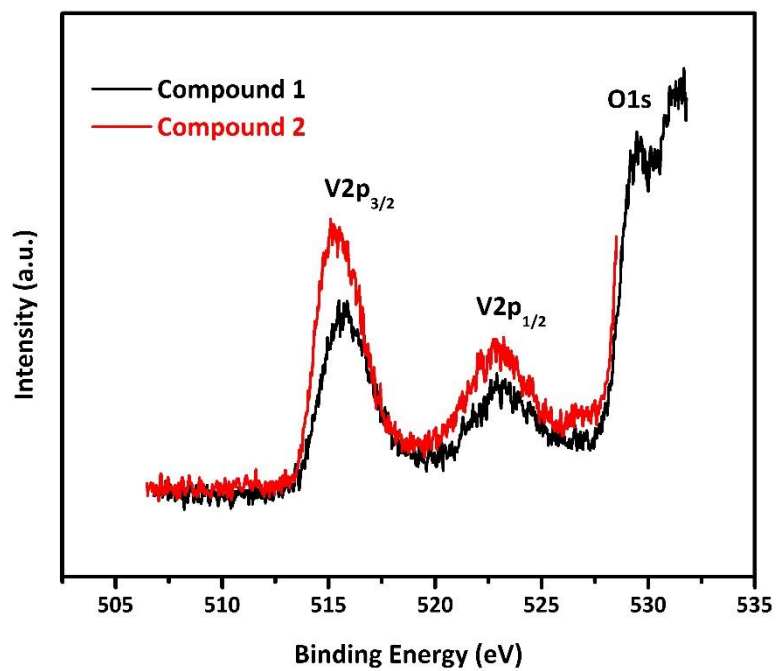

Fig. S6 Vanadium core level XPS spectra of compounds 1 and 2.

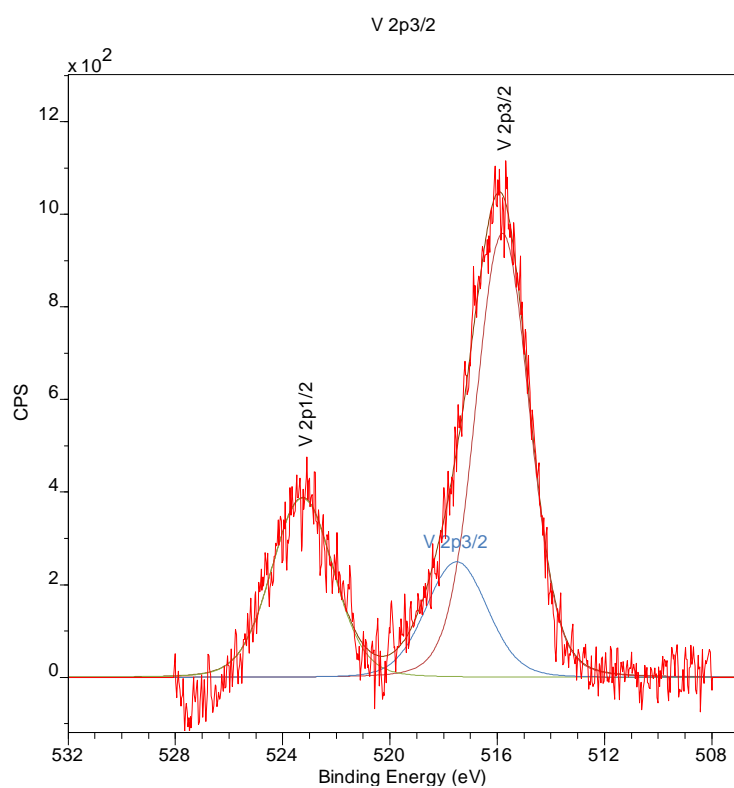

Fig. S7 Deconvoluted XPS spectrum of compound 1.

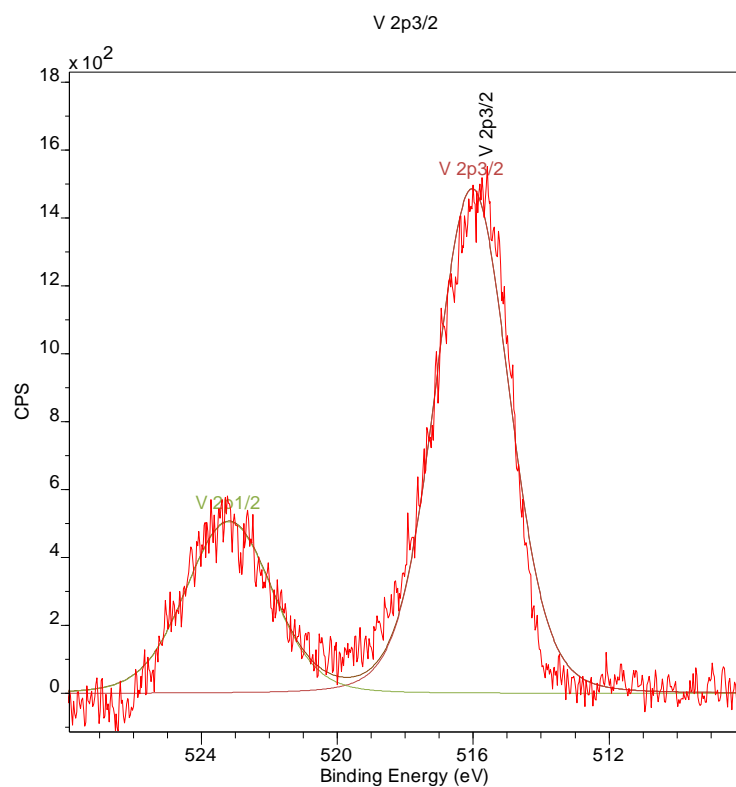

**Fig. S8** Deconvoluted XPS spectrum of compound 2.

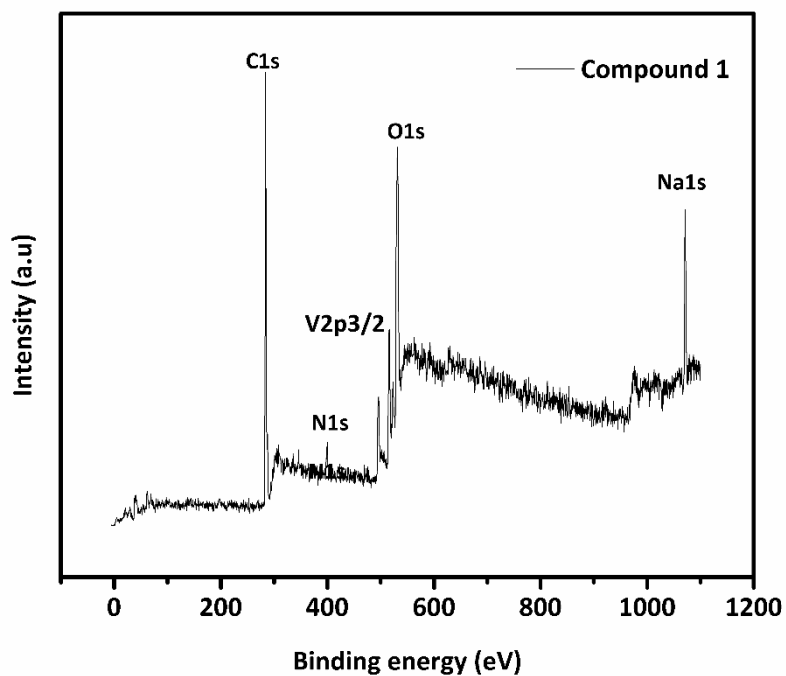

**Fig. S9** Survey scan XPS spectrum of compound 1.

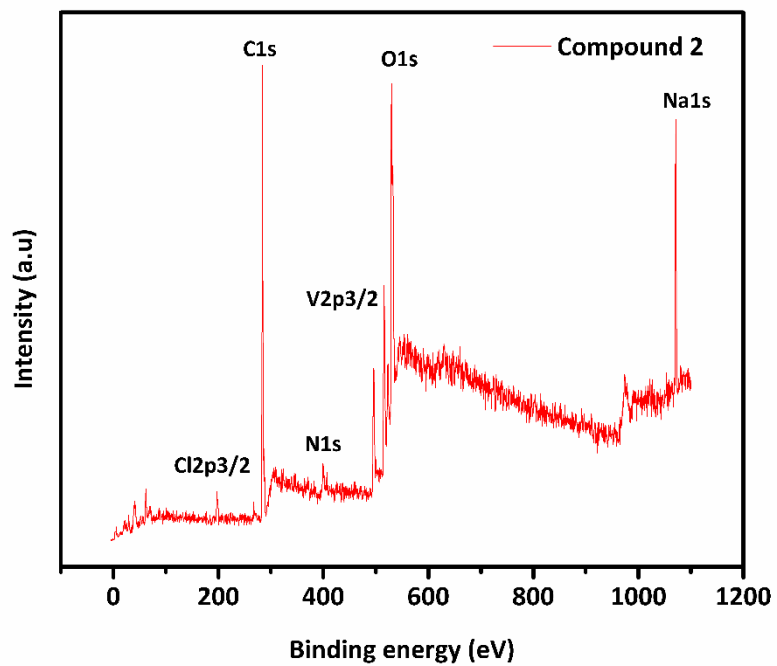

Fig. S10 Survey scan XPS spectrum of compound 2.

#### Section S6. UV-Vis absorption spectra for compounds 1 and 2

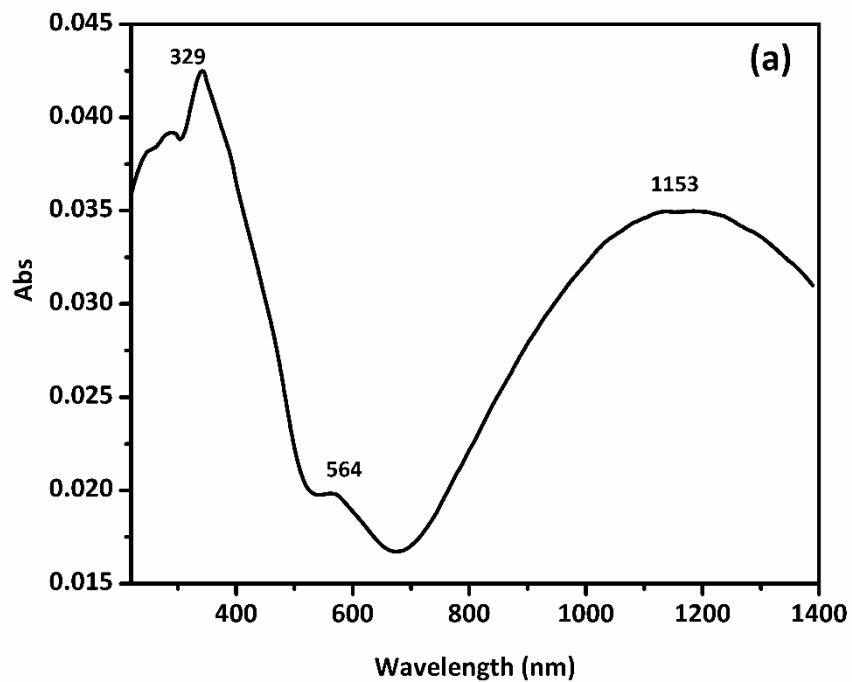

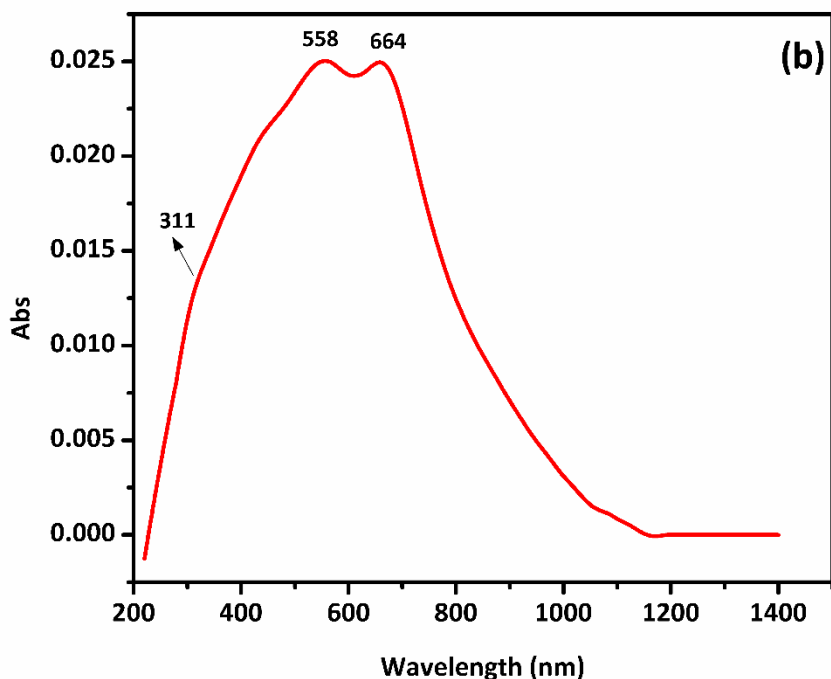

Fig. S11 UV-visible spectra of compound 1(Fig. a) and compound 2(Fig. b).

**Section S7. ICP-OES and CHN analysis reports of compounds 1 and 2**

| FEMDJFKBPCKEIH<br>KBFECEJF<br>FMLFAFCEJJCCGD<br>ISFWGADF<br>FKCAFALEBHHGNE<br>CJFKGHEF<br>Issued to:<br><b>Dr. Sathish Kumar Kurapati</b><br>C/o Prof.Samar K Das, School of Chemistry,<br>University of Hyderabad, Hyderabad-500046. |               |                       |                                           | Report No. : LLPL/18-19/001890<br>Issue Date : 08/06/2018<br>Customer Ref.: TRF |  |
|---------------------------------------------------------------------------------------------------------------------------------------------------------------------------------------------------------------------------------------|---------------|-----------------------|-------------------------------------------|---------------------------------------------------------------------------------|--|
| Kind Attn.:Mr.Sateesh.M, 9908652965                                                                                                                                                                                                   |               | Ref.Date : 31/05/2018 |                                           |                                                                                 |  |
| Sample Particulars : NaV19O46                                                                                                                                                                                                         |               |                       |                                           |                                                                                 |  |
| Qty. Received : 1No Vial                                                                                                                                                                                                              |               |                       |                                           |                                                                                 |  |
| Test Parameters : Vanadium as V,Sodium as Na                                                                                                                                                                                          |               |                       |                                           |                                                                                 |  |
| Date of Receipt of Sample : 31/05/2018                                                                                                                                                                                                |               |                       | Date of Starting of Analysis : 07/06/2018 |                                                                                 |  |
| Date of completion of analysis : 08/06/2018                                                                                                                                                                                           |               |                       | SAMPLE TESTED AS RECEIVED                 |                                                                                 |  |
| TEST RESULTS                                                                                                                                                                                                                          |               |                       |                                           |                                                                                 |  |
| S.No.                                                                                                                                                                                                                                 | Parameters    | UOM                   | Results                                   |                                                                                 |  |
| 1                                                                                                                                                                                                                                     | Vanadium as V | % by mass             | 42.33                                     |                                                                                 |  |
| 2                                                                                                                                                                                                                                     | Sodium as Na  | % by mass             | 7.20                                      |                                                                                 |  |
| Instrument Used: ICP-OES Varian 720-ES                                                                                                                                                                                                |               |                       |                                           |                                                                                 |  |
| NOTE : This report and results relate only to the sample / items tested.                                                                                                                                                              |               |                       |                                           |                                                                                 |  |

Fig. S12 ICP-OES analysis of compound 1.

FBMDJFKBFCKEIE  
KBPGJCJF  
FMLFAPCEJWCJGD  
IDBKBIIDF  
FKCAFALBHHGMB  
LJJHGBF

Issued to:

**Dr.Sathish Kumar Kurapati**  
C/o Prof.Samar K Das, School of Chemistry,  
University of Hyderabad, Hyderabad-500046.

Report No. : LLPL/18-19/001891

Issue Date : 08/06/2018

Customer Ref.: TRF

Kind Attn.: Mr.Sateesh.M. 9908652965

Ref.Date : 31/05/2018

Sample Particular: **NaV18O42(Cl)**

Qty. Received : 1No Vial

Test Parameters : Vanadium as V, Sodium as Na, Chloride as Cl

Date of Receipt of Sample : 31/05/2018

Date of Starting of Analysis : 07/06/2018

Date of completion of analysis : 08/06/2018

*SAMPLE TESTED AS RECEIVED*

**TEST RESULTS**

| S.No. | Parameters     | UOM       | Results |
|-------|----------------|-----------|---------|
| 1     | Vanadium as V  | % by mass | 42.52   |
| 2     | Sodium as Na   | % by mass | 5.44    |
| 3     | Chloride as Cl | % by mass | 1.63    |

Instrument Used: ICP-OES Varian 720-ES & IS 3025 Part 32

**NOTE:** This report and results relate only to the sample / items tested.

**Fig. S13** ICP-OES analysis of compound 2.



FLASH EA 1112 SERIES CHN REPORT  
THERMO FINNIGAN

Method filename: C:\Program Files\Thermo Finnigan\Eager 300 for EA1112\DATA\Sys\_data\_ex  
Sample ID: NA-V19 (# 31)  
Analysis type: UnkNown  
Chromatogram filename: UNK-01042019-1.dat  
Sample weight: 1.048

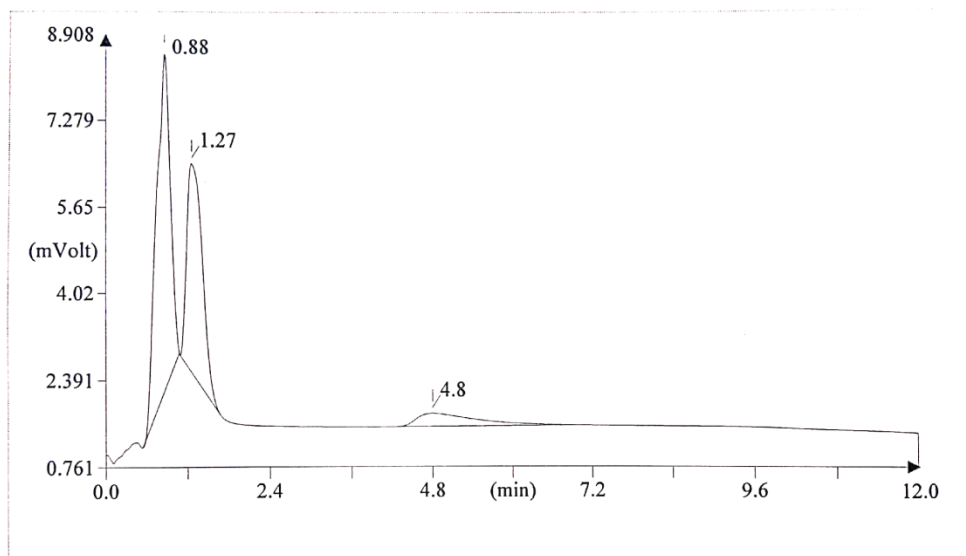

| Element Name | Element % | Ret. Time |
|--------------|-----------|-----------|
| Nitrogen     | 1.28      | 0.88      |
| Carbon       | 0.09      | 1.27      |
| Hydrogen     | 2.42      | 4.80      |

Fig. S14 CHN analysis report of compound 1.

# FLASH EA 1112 SERIES CHN REPORT THERMO FINNIGAN

Method filename: C:\Program Files\Thermo Finnigan\Eager 300 for EA1112\DATA\Sys\_data\_ex  
Sample ID: NA-V18-CL (# 32)  
Analysis type: UnkNown  
Chromatogram filename: UNK-01042019-2.dat  
Sample weight: 1.121

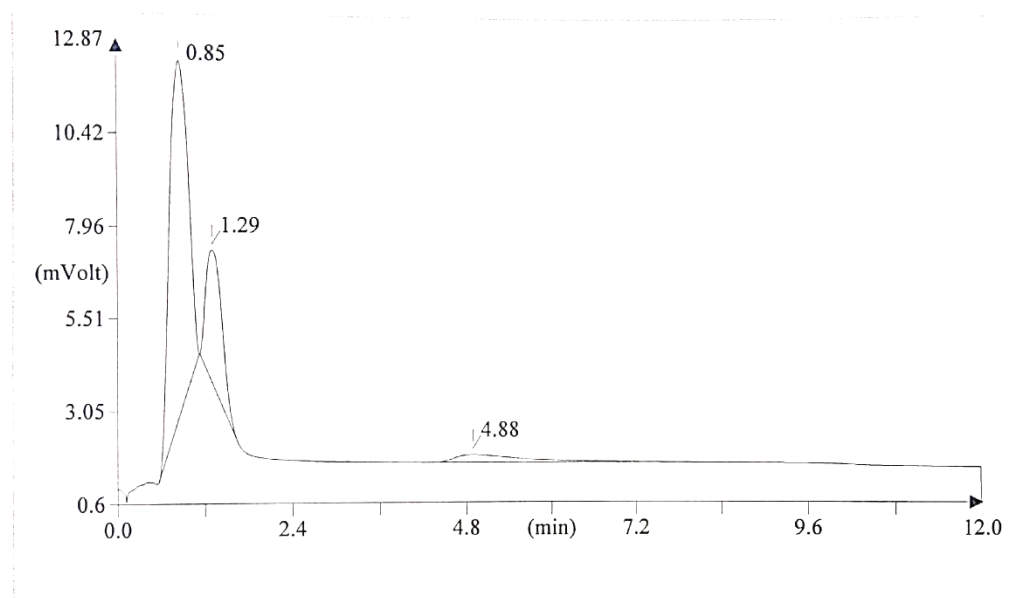

| Element Name | Element % | Ret. Time |
|--------------|-----------|-----------|
| Nitrogen     | 4.86      | 0.85      |
| Carbon       | 0.12      | 1.29      |
| Hydrogen     | 3.23      | 4.88      |

**Fig. S15** CHN analysis report of compound 2.

**Section S8. Electrochemical Impedance spectra analysis of compounds 1 and 2 and controlled experiments**

- a) Calculation of proton conductivity from Impedance spectra by fitting with equivalent circuit as described below:

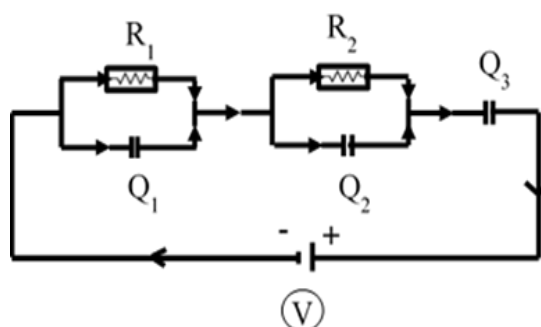

Impedance data of compounds **1** and **2** were fitted with the equivalent circuit  $\{(R_1/Q_1)+(R_2/Q_2)+Q_3\}$  that consists of three main components, connected in a series. The first component ( $Z_1$ ) contains  $(R_1/Q_1)$  contributing to electrolyte impedance/resistance. The second component ( $Z_2$ ) represents  $(R_2/Q_2)$  contributing to resistance of electrolyte-electrode interface. The third one ( $Q_3$ ) is a constant phase element contributing to lower region frequency of the Nyquist plot. However, the electrolyte resistance  $R_1$  is considered to calculate the conductivity of electrolyte. Here, the tables, given below, provide the  $R_1$  values obtained by fitting of experimental impedance data for compounds **1** and **2**.

**Table S3.** Fitting parameters used to calculate proton conductivity for compound **1** at various temperatures and 70% relative humidity (RH).

| Temp. (°C) | $R_1(\Omega)$ | Conductivity ( $\text{Scm}^{-1}$ ) |
|------------|---------------|------------------------------------|
| 50         | 82.71         | $3.01 \times 10^{-3}$              |
| 40         | 226.3         | $1.10 \times 10^{-3}$              |
| 30         | 433.2         | $5.74 \times 10^{-4}$              |
| 20         | 587.2         | $4.24 \times 10^{-4}$              |

**Table S4.** Fitting parameters used to calculate proton conductivity for compound **2** at various temperatures and 70% relative humidity (RH).

| Temp. (°C) | $R_1(\Omega)$ | Conductivity ( $\text{Scm}^{-1}$ ) |
|------------|---------------|------------------------------------|
| 50         | 1228          | $1.97 \times 10^{-4}$              |
| 40         | 1818          | $1.33 \times 10^{-4}$              |
| 30         | 3137          | $7.73 \times 10^{-5}$              |
| 20         | 4319          | $5.61 \times 10^{-5}$              |

**Calculation of proton conductivity for compound 1 from  $R_1$  value at 50 °C using the formula, described below:**

$$R = \rho \times \frac{l}{a} \dots\dots\dots Eqn (1)$$

Here we know that,

$R$  = resistance of the electrolyte (R1)

$\rho$  = specific resistance of the electrolyte

$l$  = thickness of the pellet (cm)

$a$  = cross section area of pellet (cm<sup>2</sup>)

Therefore,  $x = \frac{l}{a}$

Then the *Eqn (1)* can be written as,

$$\rho = \frac{R}{x} \dots\dots\dots Eqn (2)$$

$R_1 = 82.71$  ( $\Omega$ )

$l = 0.286$  cm

$a = 1.1455$  cm<sup>2</sup>

Therefore,  $x = 0.249$  cm<sup>-1</sup> (~ 0.25)

Specific resistance of the electrolyte ( $\rho$ ) = 332.16  $\Omega$  cm

We calculated specific resistance from *Eqn (2)*,

Then we know that, the conductance is inversely proportion to the resistance.

$$\sigma = \frac{1}{\rho} \dots\dots\dots Eqn (3)$$

By putting the specific resistance value in *Eqn (3)*, we get the specific conductivity of compound **1** at 50 °C.

Thus, the proton conductivity of compound **1**, ( $\sigma$ )<sub>50 °C</sub> = **3.01×10<sup>-3</sup> Scm<sup>-1</sup>**.

\* *Note:* Similar data fitting and calculation procedures were used to calculate proton conductivity values for **1** and **2** at various experimental conditions.

**Calculation of activation energy ( $E_a$ ) for compounds 1 and 2:**

Activation energy of compounds **1** and **2** for their proton conductivity was calculated from their variable temperature conductivity values. The derived plot was constructed as **ln( $\sigma T$ ) vs 1000/T** (refer to main text). The slope value of the plot was used in Arrhenius equation to calculate the activation energies for compounds **1** and **2**.

From Arrhenius equation,

$$\sigma T = A. e^{\left(\frac{-E_a}{RT}\right)} \dots\dots\dots Eqn (4)$$

Here,  $\sigma$  = conductivity of electrolyte, *i.e.*, proton conductivity;

$-E_a$  = activation energy for proton conduction;

$R$  = Ideal gas constant;  $T$  = temperature in Kelvins (K) scale.

Eqn (4) can be written as,

$$\ln(\sigma T) = \ln A - \left(\frac{Ea}{RT}\right) \dots \dots \dots \text{Eqn (5)}$$

Eqn (5) can be rewritten as,

$$\ln(\sigma T) = \ln A - \left(\frac{Ea}{R \times 1000}\right) \times \left(\frac{1000}{T}\right) \dots \dots \dots \text{Eqn (6)}$$

Eqn (6) represent the straight line between  $\ln(\sigma T)$  and  $1000/T$ .

Thus, value of slope (**m**) =  $-\left(\frac{Ea}{R \times 1000}\right)$

For compound **1** slope (**m**) =  $-2.813 \text{ S cm}^{-1} \text{ K}^2$ .  
 And compound **2** slope (**m**) =  $-2.194 \text{ S cm}^{-1} \text{ K}^2$ .

Therefore, the activation energy for compound **1**, **Ea = 0.24 eV (23.3 kJ/mol)**,  
 Whereas for compound **2**, **Ea = 0.19 eV (18.4 kJ/mol)**

**b) Detailed calculations of standard deviation of proton conductivity values for compounds 1 and 2:**

The following equation (1) was used to calculate the standard deviation of compounds **1** and **2**. For this calculation, four proton conductivity measurements were recorded in 24 hours with 6 hours regular time intervals at a particular temperature and relative humidity (i.e., 50 °C and 70% RH). The obtained four proton conductivity values were used to calculate the standard deviation for compounds **1** and **2**.

$$S^2 = \frac{\sum(xi-xa)^2}{n-1} \dots \dots \dots \text{equation (1)}$$

Hence here,

$xi$  = Proton conductivity value,

$xa$  = Mean value of total number of proton conductivity values, here is four data points,

$n$  = Number of data points,

$S$  = Standard deviation.

For compound **1**:

| Cycle number    | $xi$                  | $xa$                  | $(xi - xa)$          | $(xi - xa)^2$         |
|-----------------|-----------------------|-----------------------|----------------------|-----------------------|
| 1 <sup>st</sup> | $3.01 \times 10^{-3}$ | $3.62 \times 10^{-3}$ | $6.1 \times 10^{-4}$ | $3.72 \times 10^{-7}$ |
| 2 <sup>nd</sup> | $2.99 \times 10^{-3}$ |                       | $6.3 \times 10^{-4}$ | $3.96 \times 10^{-7}$ |
| 3 <sup>rd</sup> | $3.68 \times 10^{-3}$ |                       | $6.0 \times 10^{-5}$ | $3.6 \times 10^{-9}$  |
| 4 <sup>th</sup> | $4.83 \times 10^{-3}$ |                       | $1.2 \times 10^{-3}$ | $1.46 \times 10^{-6}$ |

Note: the sign is taken as positive in the calculation of  $(xi - xa)$  and  $(xi - xa)$ .

$$x_a = \frac{\text{sum of all } x_i \text{ values}}{\text{number of data points}} \dots \text{equation (2)}$$

$$x_a = \frac{\{(3.01 \times 10^{-3}) + (2.99 \times 10^{-3}) + (3.68 \times 10^{-3}) + (4.83 \times 10^{-3})\}}{4}$$

$$x_a = 3.627/1000$$

The total sum value of  $(x_i - x_a)^2 = 2.231 \times 10^{-6}$

Equation 1 written as,  $S = \sqrt{\frac{\sum (x_i - x_a)^2}{n-1}}$

$$S = \sqrt{\frac{\sum 2.231 \times 10^{-6}}{4 - 1}}$$

$$S = \sqrt{7.438 \times 10^{-7}}$$

Standard deviation for compound 1 (S) =  $8.62 \times 10^{-4} \text{ Scm}^{-1}$

For compound 2:

The same calculation procedure of compound 1 followed to calculate the standard deviation of compound 2.

| Cycle number    | $x_i$                 | $x_a$                 | $(x_i - x_a)$        | $(x_i - x_a)^2$        |
|-----------------|-----------------------|-----------------------|----------------------|------------------------|
| 1 <sup>st</sup> | $1.97 \times 10^{-4}$ | $2.16 \times 10^{-4}$ | $1.9 \times 10^{-5}$ | $3.61 \times 10^{-10}$ |
| 2 <sup>nd</sup> | $1.86 \times 10^{-4}$ |                       | $3.0 \times 10^{-5}$ | $9.0 \times 10^{-10}$  |
| 3 <sup>rd</sup> | $1.96 \times 10^{-4}$ |                       | $2.0 \times 10^{-5}$ | $4.0 \times 10^{-10}$  |
| 4 <sup>th</sup> | $2.85 \times 10^{-4}$ |                       | $6.9 \times 10^{-5}$ | $4.76 \times 10^{-9}$  |

The total sum value of  $(x_i - x_a)^2 = 6.421 \times 10^{-9}$

Standard deviation for compound 2 (S) =  $4.621 \times 10^{-5} \text{ Scm}^{-1}$

c) Controlled experiments on residual electrolyte of compounds 1 and 2 after EIS measurements

(1) FTIR spectra:

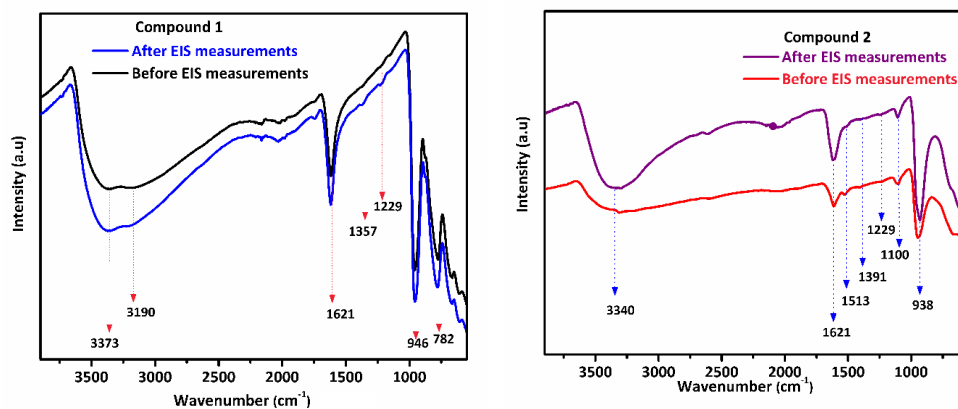

Fig. S16 FTIR spectra of compound 1 (left) and compound 2 (right) before and after EIS measurements.

(2) Raman spectra:

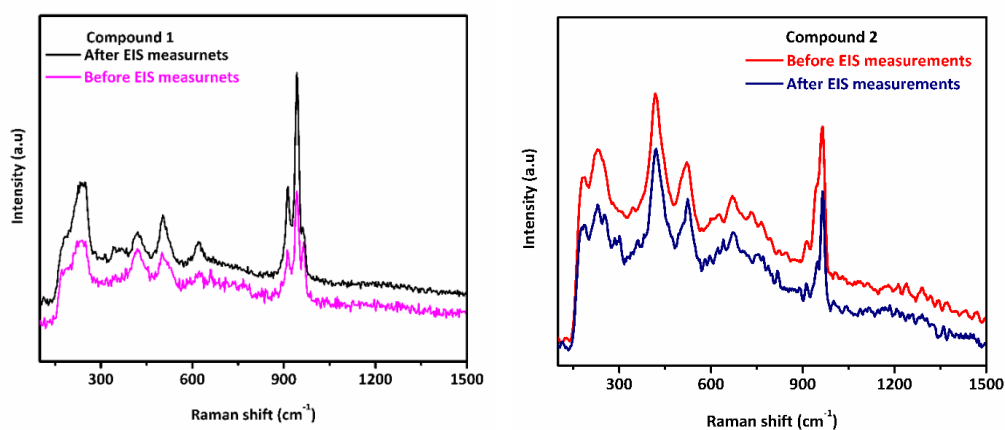

Fig. S17 Raman spectra of compound 1(left) and compound 2 (right) before and after EIS measurements.

(3) UV-Vis absorption spectra:

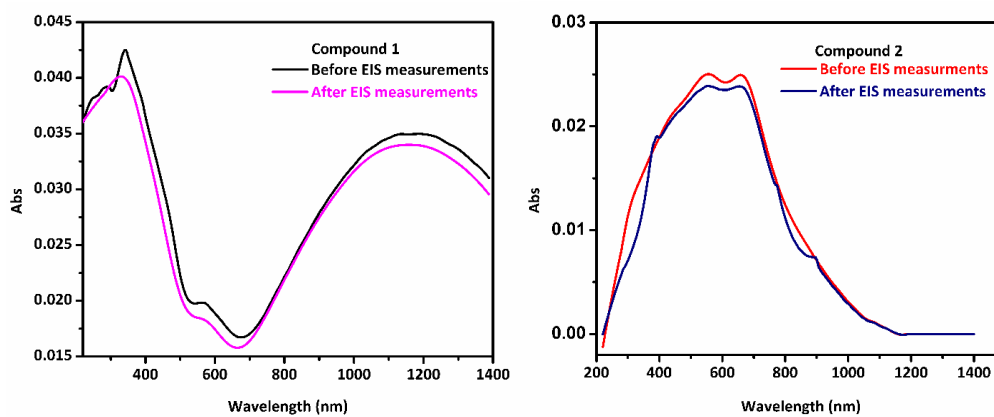

Fig. S18 UV-visible spectra of compound 1 (left) and compound 2 (right) before and after EIS measurements.

#### (4) PXRD profiles:

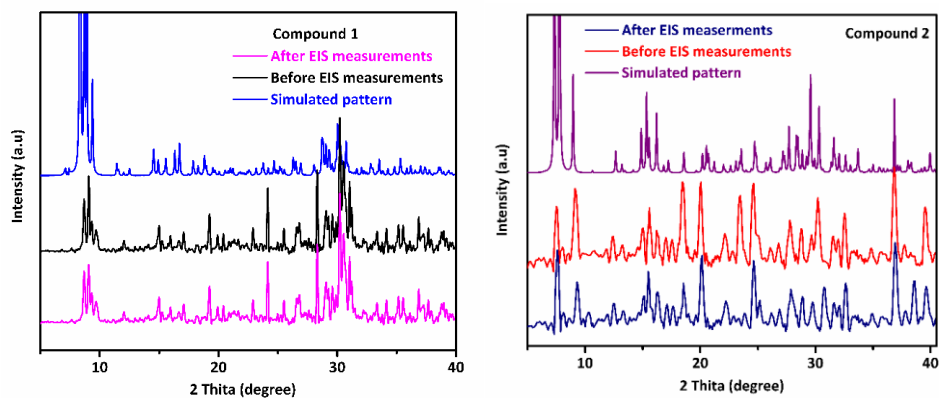

Fig. S19 Powder X-ray diffraction analysis of compound 1 (left) and compound 2 (right) before and after EIS measurements.

#### (5) XPS spectra:

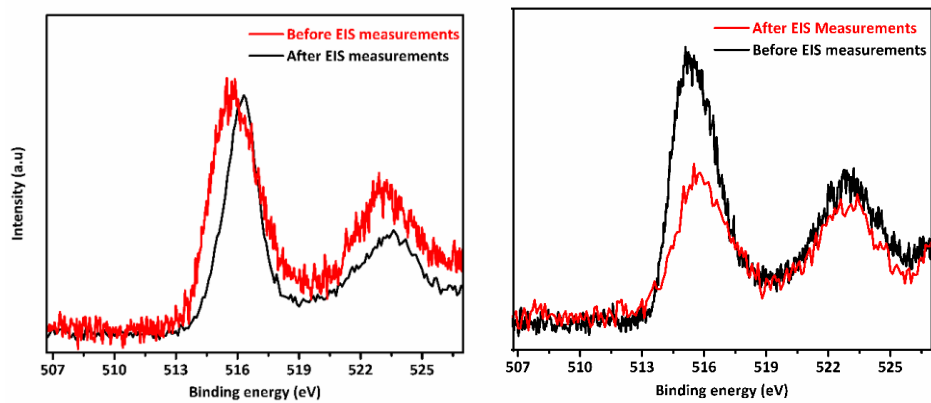

Fig. S20 XPS spectra of compound 1(left) and compound 2 (right) before and after EIS measurements.



**Table S5.** Comparison of proton conductivity values of compounds **1** and **2** with those of other reported POMs

| S.No | Compound Name/formula                                                                                                                                                         | Conductivity (S cm <sup>-1</sup> ) | $E_a$ (kJ mole <sup>-1</sup> ) | Conditions        | References | Type     |
|------|-------------------------------------------------------------------------------------------------------------------------------------------------------------------------------|------------------------------------|--------------------------------|-------------------|------------|----------|
| 1    | H <sub>3</sub> [PMo <sub>12</sub> O <sub>40</sub> ].29H <sub>2</sub> O                                                                                                        | 1.8×10 <sup>-1</sup>               | 15.5                           | 25°C, 85% RH      | S1         | POM      |
| 2    | [I <sub>3</sub> -(Mo <sup>V</sup> <sub>2</sub> O <sub>2</sub> S <sub>2</sub> ) <sub>8</sub> (Se <sup>IV</sup> O <sub>3</sub> ) <sub>8</sub> (OH) <sub>8</sub> ] <sup>9-</sup> | 1.2×10 <sup>-2</sup>               | 74.29                          | 55 °C, 97% RH     | S2         | POM      |
| 3    | [Zn(P <sub>3</sub> Mo <sub>6</sub> O <sub>29</sub> ) <sub>2</sub> ] <sup>12-</sup>                                                                                            | 1.04×10 <sup>-2</sup>              | 21.22                          | 80 °C, 75% RH     | S3         | POM      |
| 4    | [H <sub>8</sub> P <sub>2</sub> W <sub>16</sub> V <sub>2</sub> O <sub>62</sub> ].20H <sub>2</sub> O                                                                            | 1.89×10 <sup>-2</sup>              | 31.91                          | 18 °C, 80% RH     | S4         | POM      |
| 5    | [H <sub>7</sub> SiW <sub>9</sub> V <sub>3</sub> O <sub>40</sub> ].9H <sub>2</sub> O                                                                                           | 8.11×10 <sup>-3</sup>              | 26.69                          | 58 °C, 50% RH     | S5         | POM      |
| 6    | [H <sub>8</sub> V <sub>18</sub> O <sub>42</sub> (VO <sub>4</sub> )] <sup>7-</sup> ( <b>1</b> )                                                                                | 3.01×10 <sup>-3</sup>              | 23.34                          | 50 °C, 70% RH     | This work  | POM      |
| 7    | [H <sub>8</sub> V <sub>18</sub> O <sub>42</sub> (VO <sub>4</sub> )] <sup>5-</sup> ( <b>2</b> )                                                                                | 2.16×10 <sup>-4</sup>              | 18.40                          | 50 °C, 70% RH     | This work  | POM      |
| 8    | [MnV <sub>13</sub> O <sub>38</sub> ] <sup>7-</sup>                                                                                                                            | 4.68 × 10 <sup>-3</sup>            | 43.41                          | 61 °C, 97% RH     | S6         | POM      |
| 9    | [PMo <sup>V</sup> <sub>18</sub> Mo <sup>V</sup> <sub>4</sub> V <sup>IV</sup> <sub>4</sub> O <sub>42</sub> ] <sup>11-</sup>                                                    | 1.5 × 10 <sup>-3</sup>             | 31.83                          | 75 °C, 98% RH     | S7         | POM-MOF  |
| 10   | H <sub>6</sub> [SiW <sub>9</sub> MoV <sub>2</sub> O <sub>40</sub> ].15H <sub>2</sub> O                                                                                        | 6.01 × 10 <sup>-3</sup>            | 27.5                           | 22 °C, 80% RH     | S8         | POM      |
| 11   | NbO <sub>2</sub> (OH)-PW <sub>12</sub>                                                                                                                                        | 7.3 × 10 <sup>-3</sup>             | 37.62                          | 77 °C, 97% RH     | S9         | POM      |
| 12   | [ε-H <sub>2</sub> PMo <sub>8</sub> <sup>V</sup> Mo <sub>4</sub> <sup>VI</sup> O <sub>40</sub> Zn <sub>4</sub> ] <sup>3-</sup>                                                 | 1.5×10 <sup>-5</sup>               | 114.81                         | 90 °C, 85% RH     | S10        | POM      |
| 13   | [Mo <sub>6</sub> O <sub>16</sub> (OH)(H <sub>2</sub> O) <sub>4</sub> ] <sub>4</sub> <sup>12-</sup>                                                                            | 2.19×10 <sup>-2</sup>              | 62.39                          | 90 °C, 98% RH     | S11        | ATMP-POM |
| 14   | (HPW- <i>meso-silica</i> )                                                                                                                                                    | 1.104×10 <sup>-1</sup>             | ~14                            | 90 °C, 100% RH    | S12        | POM-PEM  |
| 15   | TiO <sub>2</sub> -P <sub>2</sub> O <sub>5</sub>                                                                                                                               | 1.6×10 <sup>-2</sup>               | 8.68                           | 160 °C, 100% RH   | S13        | CGMN     |
| 16   | EB-COF:PW <sub>12</sub>                                                                                                                                                       | 3.32×10 <sup>-3</sup>              | 23.15                          | 25 °C, 97% RH     | S14        | POM-COF  |
| 17   | POM-SVP <sub>97</sub> K-5                                                                                                                                                     | 2.21×10 <sup>-4</sup>              | 13.50                          | 25 – 65 °C, 0% RH | S15        | POM-PEM  |

**Abbreviations:**

- (**POM-OF**) a Polyoxometalate Based Open Framework.
- (**ATMP-POM**) Amino trimethylene phosphonic acid based polyoxometalate.
- (**POMOF**) polyoxometalates based metal organic frame work.
- (**POM-PEM**) polyoxometalates proton exchange membrane.
- (**POM-COF**) polyoxometalates based covalent organic frame work.
- (**CGMN**) Crystalline Glass, Mesoporous Nanocomposite.

## Section S9. References

- [S1] O. Nakamura, T. Kodama, I. Ogino and Y. Miyake, *Chem. Lett.* 1979, **8**, 17-18.
- [S2] H.-Y. Zang, J.-J. Chen, D.-L. Long, L. Cronin and H. N. Miras, *Adv. Mater.* 2013, **25**, 6245-6249.
- [S3] Q. Gao, X.-L. Wang, J. Xu and X.-H. Bu, *Chem. Eur. J.* 2016, **22**, 9082-9086.
- [S4] X. Wu, H. Cai, Q. Wu and W. Yan, *Mater. Lett.* 2016, **181**, 1-3.
- [S5] N. Tian, M. Zhu, Q. Wu, W. Yan and A. B. Yaroslavtsev, *Mater. Lett.* 2014, **115**, 165-167.
- [S6] J.-X. Wang, Y.-D. Wang, M.-J. Wei, H.-Q. Tan, Y.-H. Wang, H.-Y. Zang and Y.-G. Li, *Inorg. Chem. Front.*, 2018, **5**, 1213-1217.
- [S7] J. Li, X.-L. Cao, Y.-Y. Wang, S.-R. Zhang, D.-Y. Du, J.-S. Qin, S.-L. Li, Z.-M. Su and Y.-Q. Lan, *Chem – A Eur. J.*, 2016, **22**, 9299-9304.
- [S8] H. Cai, X. Wu, Q. Wu and W. Yan, *Dalton Trans.*, 2016, **45**, 14238-14242.
- [S9] Y.-D. Wang, J.-X. Wang, M.-J. Wei, B.-L. Liu, H.-Y. Zang, H.-Q. Tan, Y.-H. Wang and Y.-G. Li, *ChemElectroChem*, 2018, **5**, 1125-1129.
- [S10] B.-X. Dong, Y.-C. Wu, H. Tian, C.-B. Liu, W.-L. Liu and Y.-L. Teng, *J. Clust. Sci.* 2016, **27**, 361-371.
- [S11] L. Yang, P. Ma, Z. Zhou, J. Wang and J. Niu, *Inorg. Chem.* 2013, **52**, 8285-8287.
- [S12] Y. Zhou, J. Yang, H. Su, J. Zeng, S. P. Jiang and W. A. Goddard, *J. Am. Chem. Soc.* 2014, **136**, 4954-4964.
- [S13] M. Yamada, D. Li, I. Honma and H. Zhou, *J. Am. Chem. Soc.* 2005, **127**, 13092-13093.
- [S14] H. Ma, B. Liu, B. Li, L. Zhang, Y.-G. Li, H.-Q. Tan, H.-Y. Zang and G. Zhu, *J. Am. Chem. Soc.* 2016, **138**, 5897-5903.
- [S15] L. Zhang, T. Cui, X. Cao, C. Zhao, Q. Chen, L. Wu and H. Li, *Angew. Chem. Int. Ed.* 2017, **56**, 9013-9017.

\*\*\*\*\*End\*\*\*\*\*
